# Supplementary material for: Characterization of a recently evolved flavonol-phenylacyltransferase gene provides signatures of natural light selection in Brassicaceae
Source: Springer Nature journal article supplement (doi:10.1038/ncomms12399), 2016-08-22
Supplement: 41467_2016_BFncomms12399_MOESM963_ESM.pdf [file 41467_2016_BFncomms12399_MOESM963_ESM.pdf]

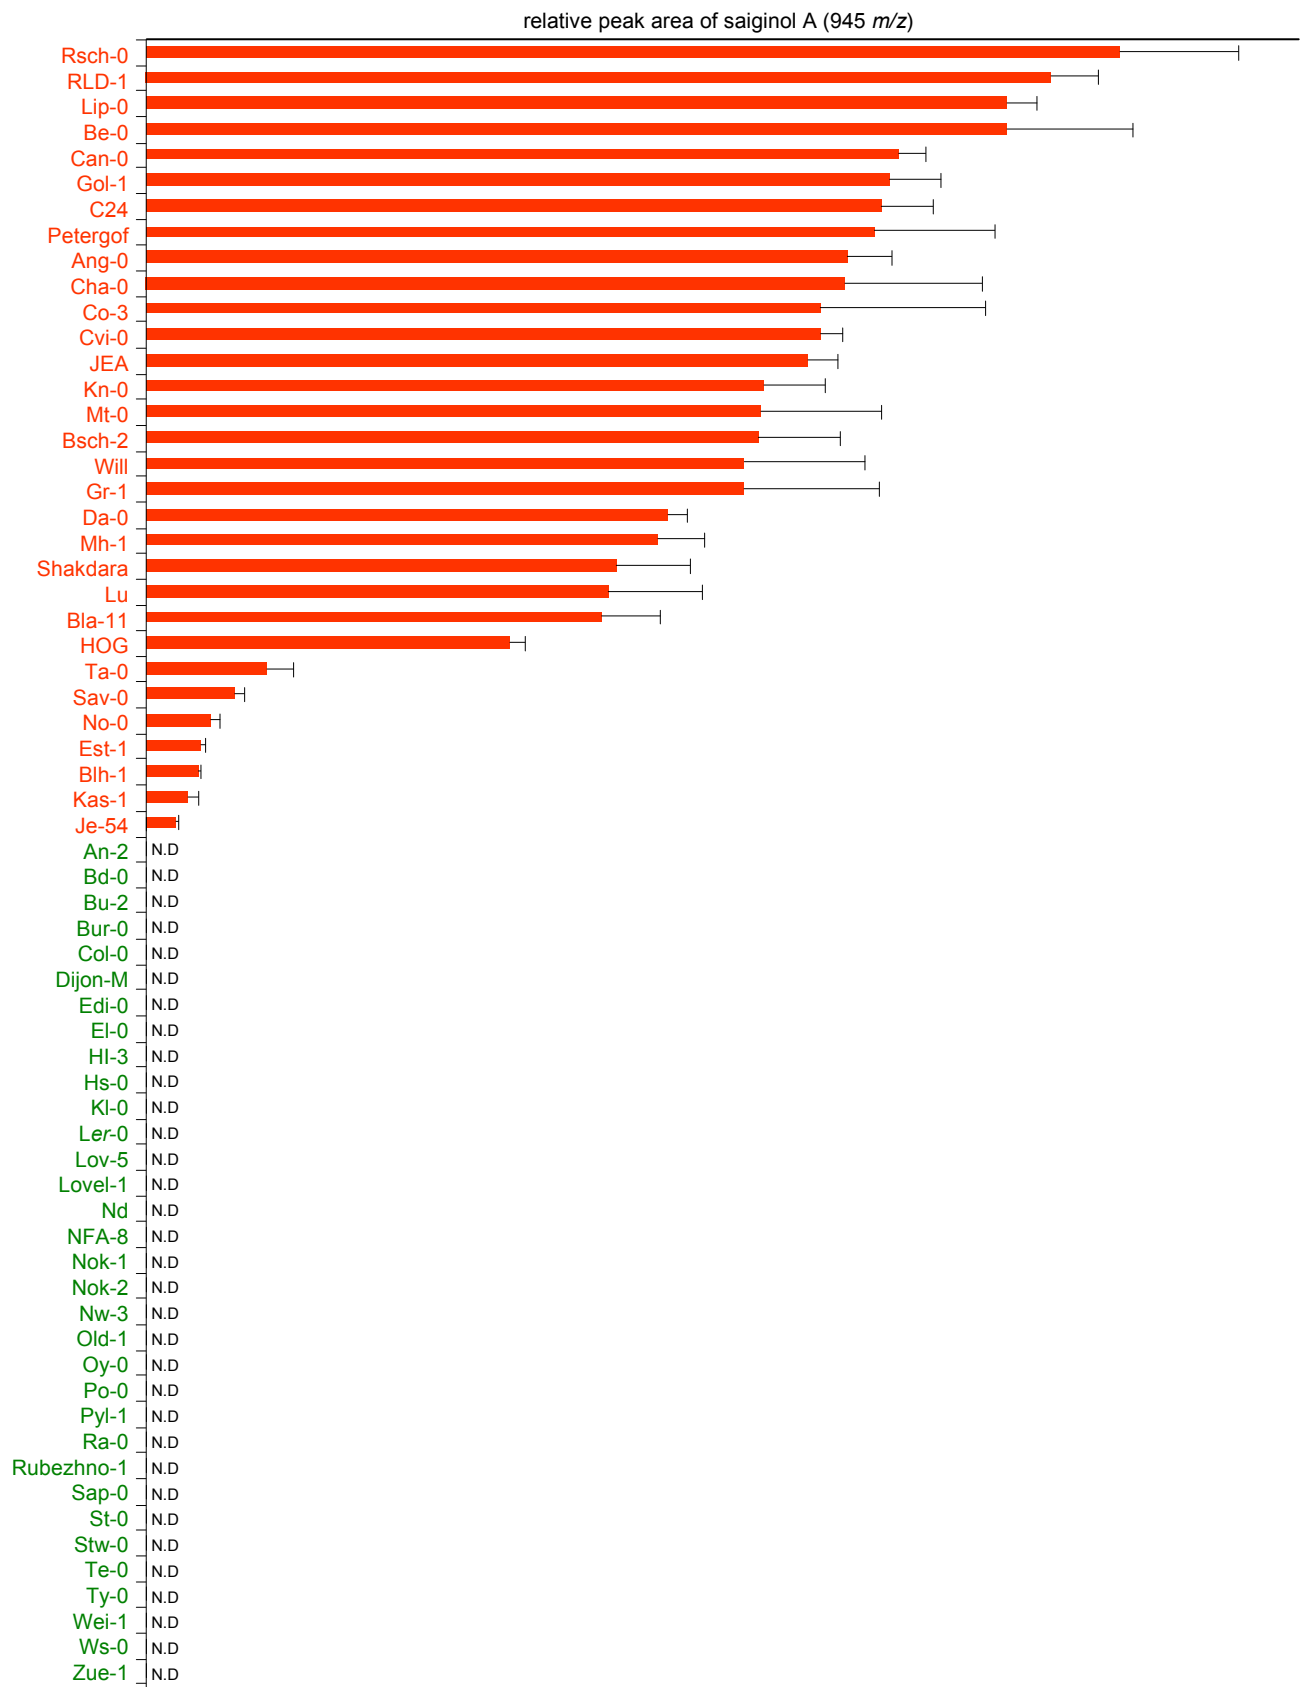

**Supplementary Fig. 1 | Abundance of saiginol A in *Arabidopsis thaliana* accession flower.** Content of saiginol A was presented by relative peak area (RA). A total of 64 accessions were profiled in biological triplicate (n=3). Data is presented as mean  $\pm$  S.E.M.

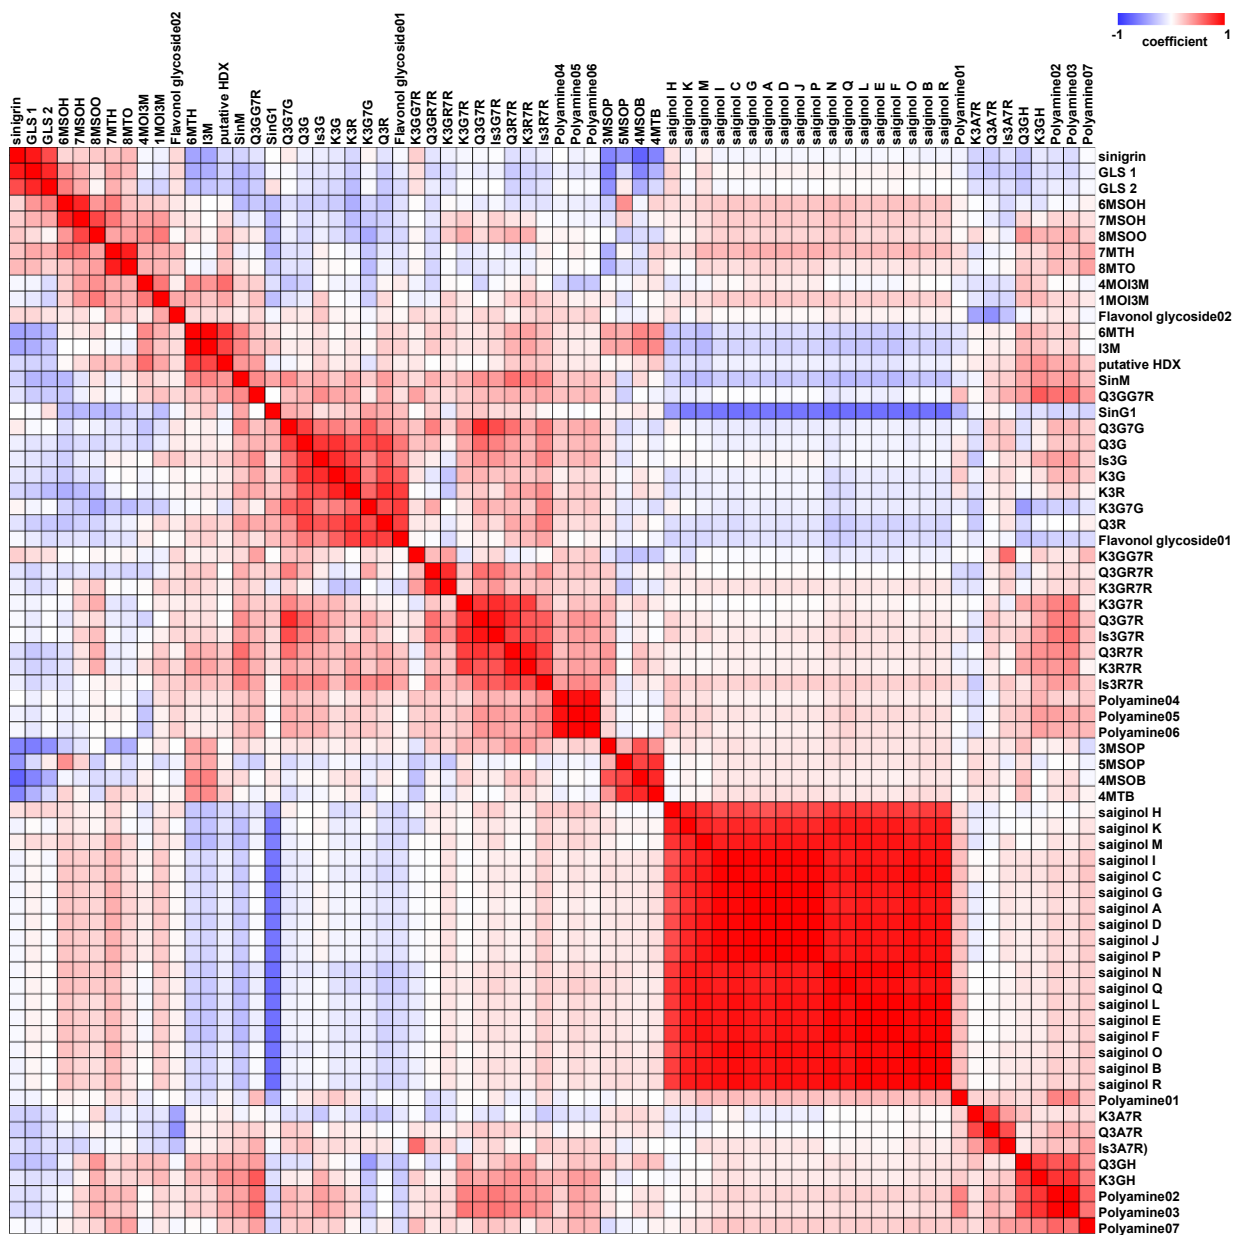

**Supplementary Fig. 2 | Heatmap of coefficient correlation of metabolite contents in Arabidopsis accessions.**

Hierarchical clustering (HCA) was performed by Person correlation using the values displayed on a log2 scaled relative peak area (RA) by the average of all values. Heatmap shows values displayed on coefficient values by red (1) and blue (-1).

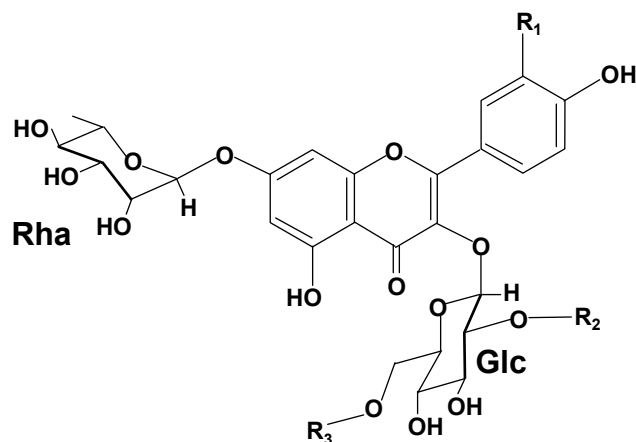

|             |                                              |
|-------------|----------------------------------------------|
| saiginol A: | $R_1=H, R_2=Rha, R_3=$ sinapoyl              |
| saiginol B: | $R_1=H, R_2=Rha, R_3=$ caffeoyl              |
| saiginol C: | $R_1=H, R_2=Rha, R_3=$ <i>p</i> -coumaroyl   |
| saiginol D: | $R_1=H, R_2=H, R_3=$ sinapoyl                |
| saiginol E: | $R_1=H, R_2=H, R_3=$ caffeoyl                |
| saiginol F: | $R_1=H, R_2=H, R_3=$ <i>p</i> -coumaroyl     |
| saiginol G: | $R_1=OH, R_2=Rha, R_3=$ sinapoyl             |
| saiginol H: | $R_1=OH, R_2=Rha, R_3=$ caffeoyl             |
| saiginol I: | $R_1=OH, R_2=Rha, R_3=$ <i>p</i> -coumaroyl  |
| saiginol J: | $R_1=OH, R_2=H, R_3=$ sinapoyl               |
| saiginol K: | $R_1=OH, R_2=H, R_3=$ caffeoyl               |
| saiginol L: | $R_1=OH, R_2=H, R_3=$ <i>p</i> -coumaroyl    |
| saiginol M: | $R_1=OMe, R_2=Rha, R_3=$ sinapoyl            |
| saiginol N: | $R_1=OMe, R_2=Rha, R_3=$ caffeoyl            |
| saiginol O: | $R_1=OMe, R_2=Rha, R_3=$ <i>p</i> -coumaroyl |
| saiginol P: | $R_1=OMe, R_2=H, R_3=$ sinapoyl              |
| saiginol Q: | $R_1=OMe, R_2=H, R_3=$ caffeoyl              |
| saiginol R: | $R_1=OMe, R_2=H, R_3=$ <i>p</i> -coumaroyl   |

**Supplementary Fig. 3 | Chemical structure of saiginol A-R.**

Abbreviations: Glc, glucose; Rha, rhamnose.

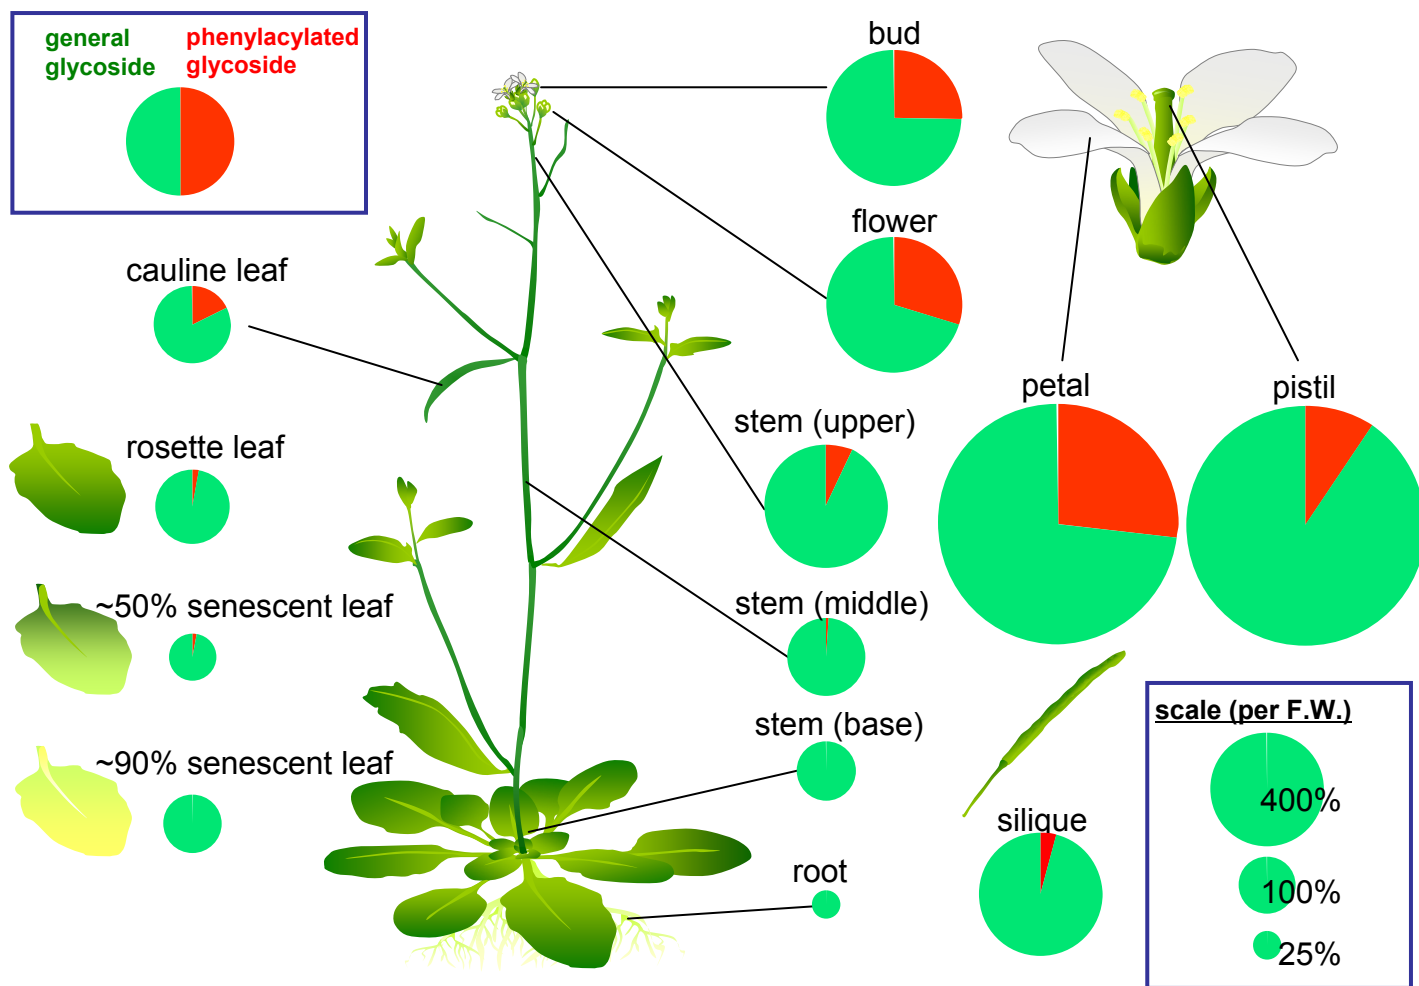

**Supplementary Fig. 4 | Tissue specificity of the accumulation of saiginols.**

Relative ratio of phenylacylated(red)/non-phenylacylated(green) flavonols in producer C24 accession was presented.

— saiginol A (945 *m/z*)  
— saiginol G (961 *m/z*)

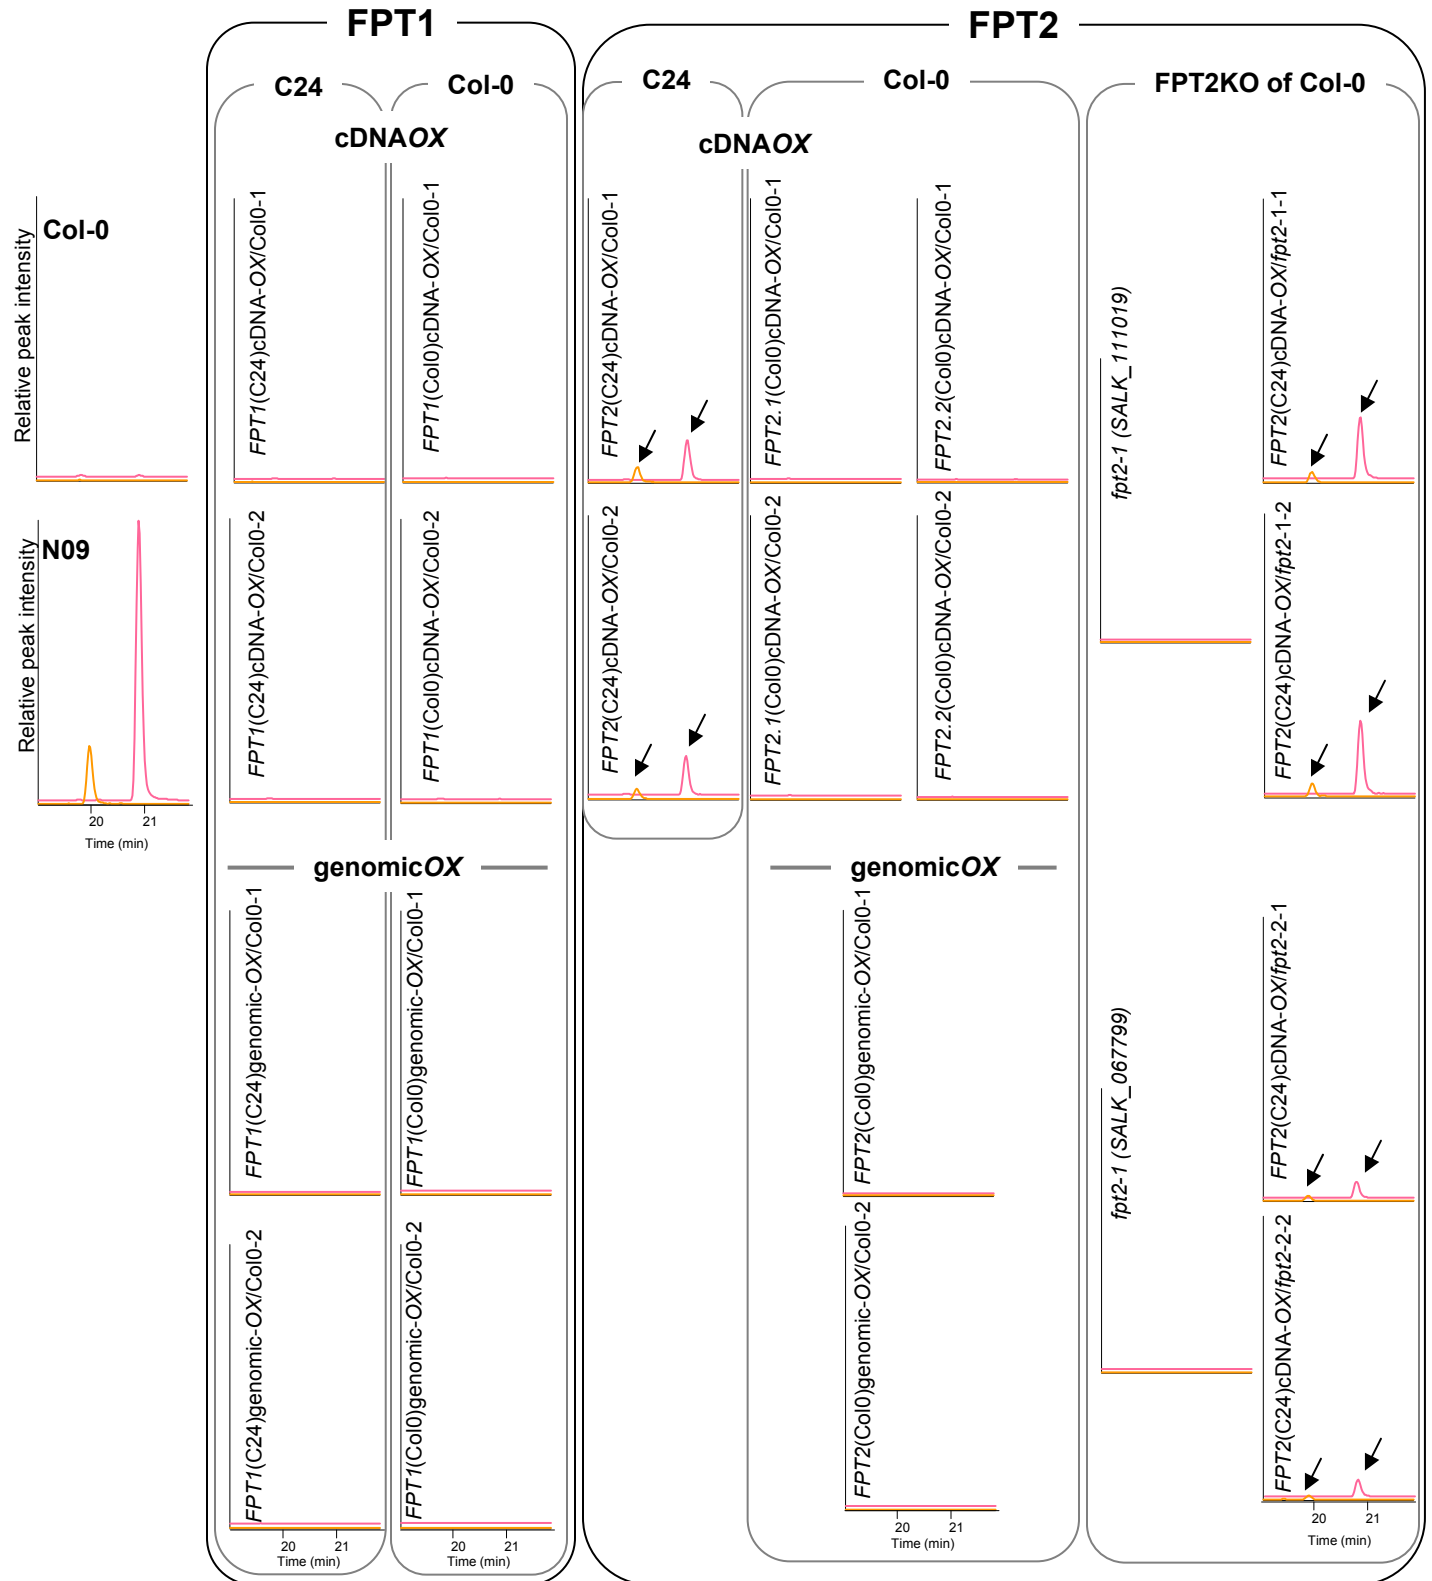

**Supplementary Fig. 5 | Profiling of saiginol production in *FPT* transgenic lines.** Transgenic lines which were 35S-overexpressed of cDNA and genomic sequence of *FPT1* (At2g22920) and *FPT2* (At2g22960) cloned from Col-0 (non-producer accession) and C24 (producer accession) in Col-0 and two individual *FPT2* T-DNA knockout mutants (SALK\_067799 and SALK\_111019) were used for the evaluation of the function of *FPT1* and *FPT2*.

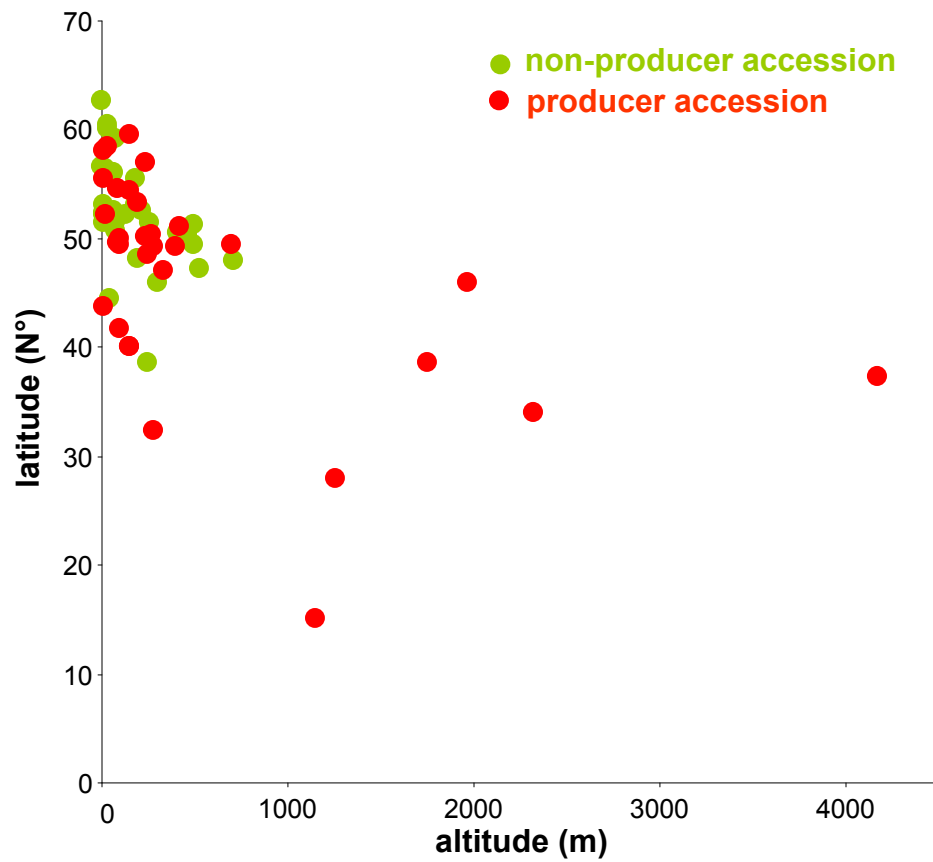

**Supplementary Fig. 6 | Plots of producers and non-producers by latitude (N°) and altitude (m).**

Green and orange indicates non-producing and producing accessions, respectively.

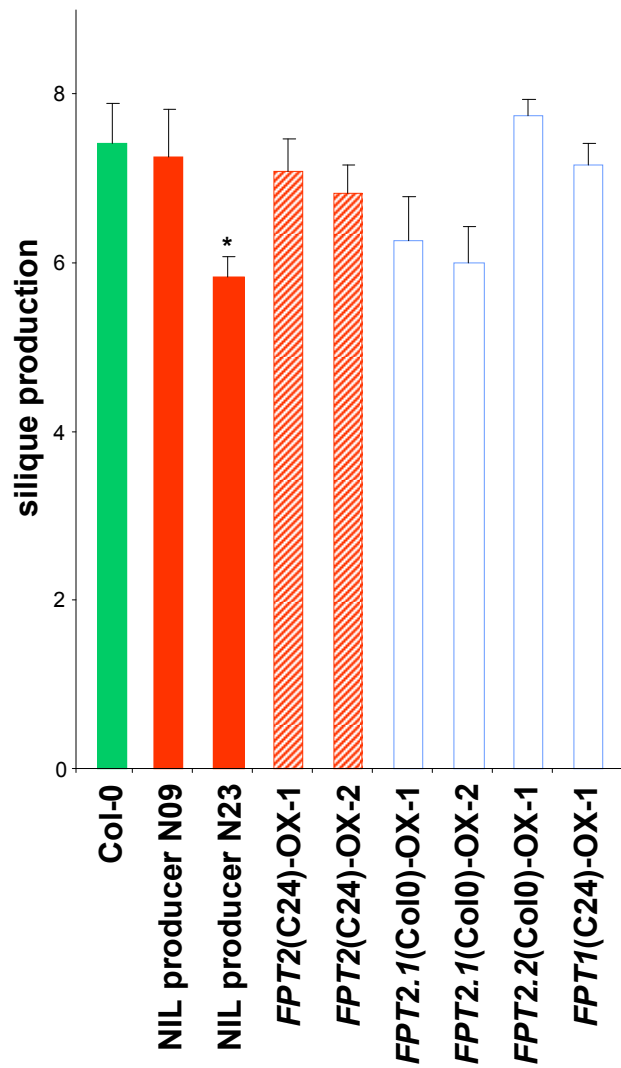

**Supplementary Fig. 7 | Rate of silique production in normal light condition using the detached immature inflorescences of first bolting.**

Error bars indicate the SE of 12 biological replicates. Data is presented as mean ± S.E.M. \* $P < 0.05$ .

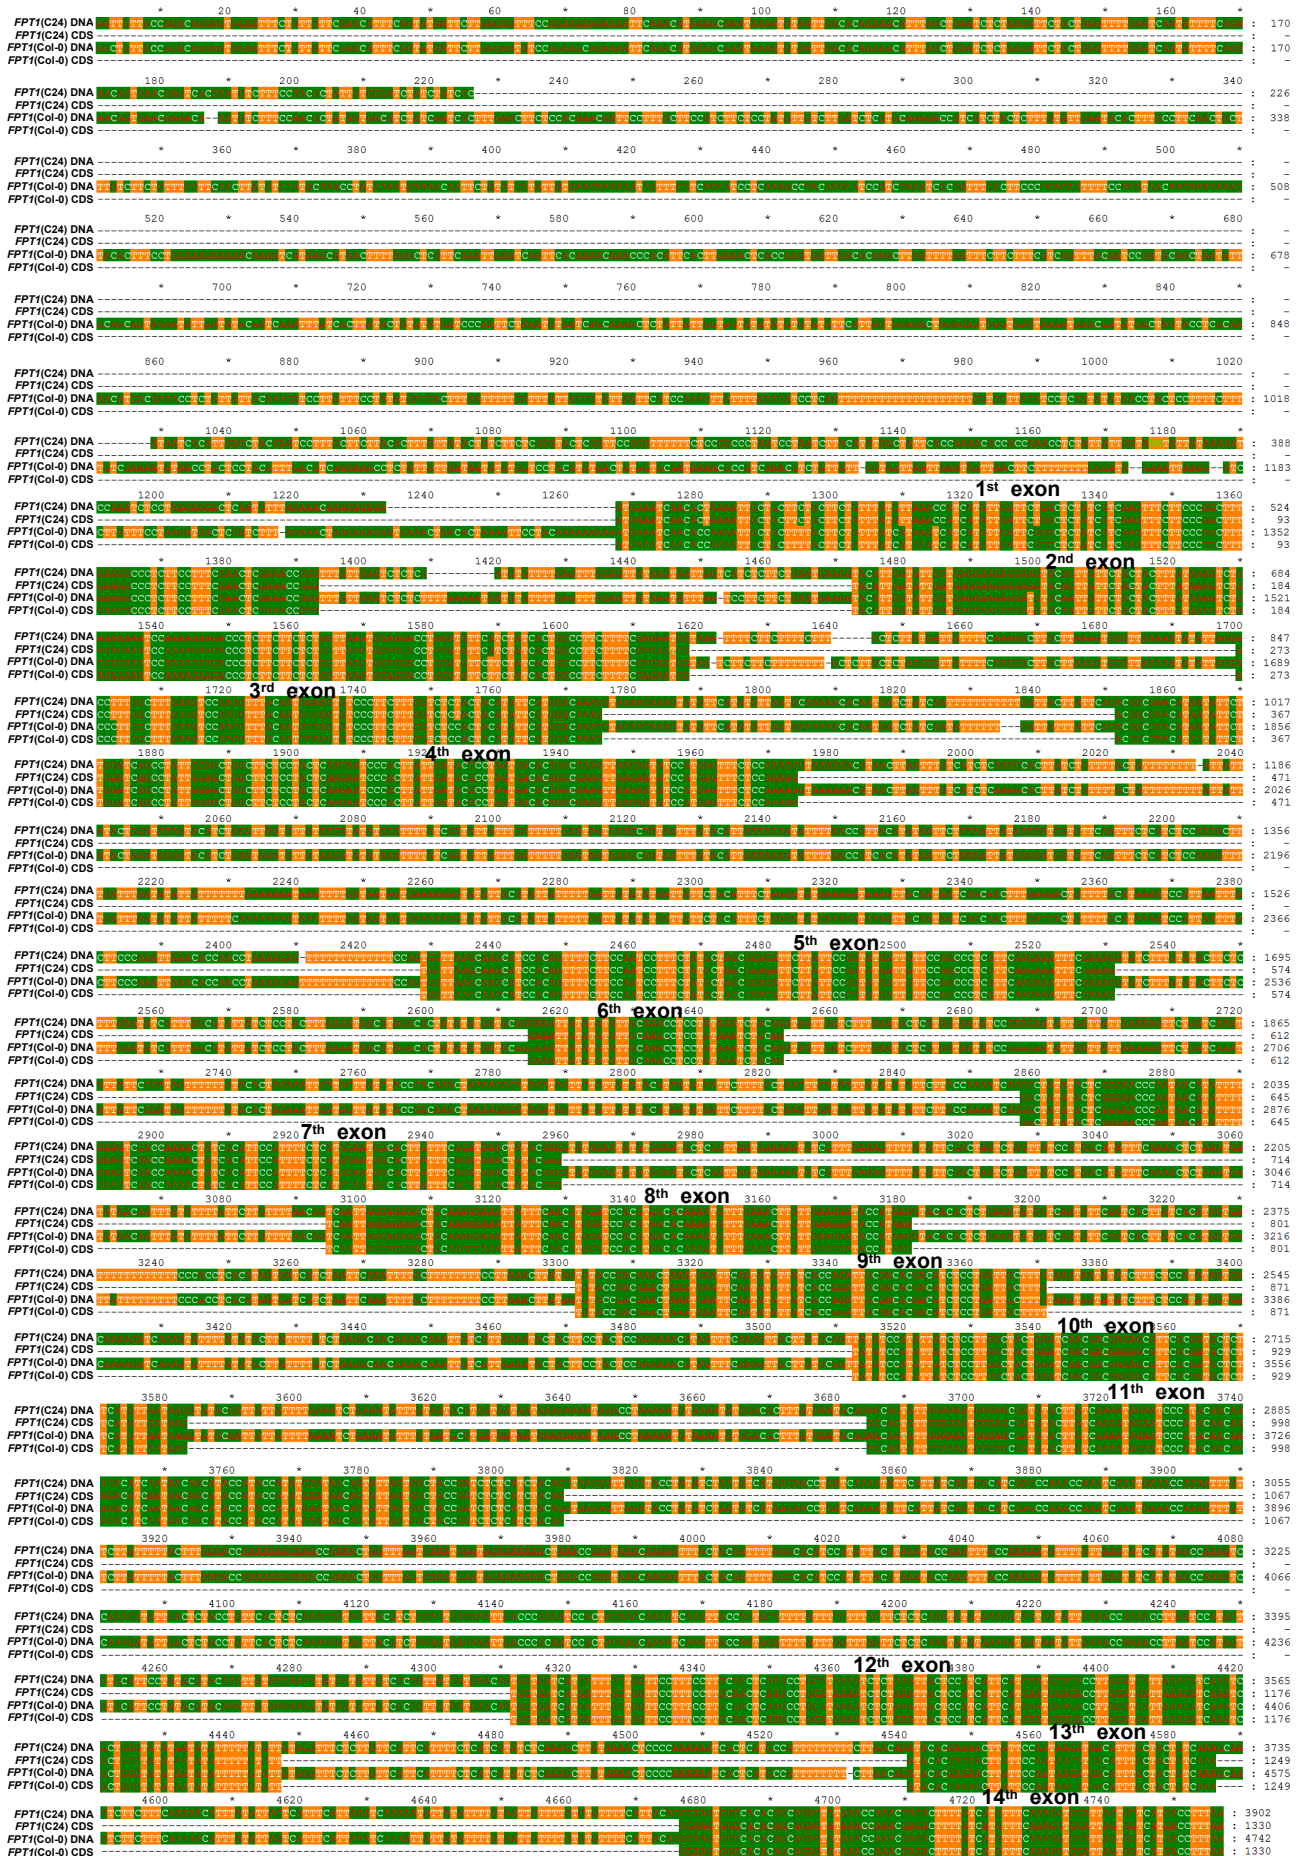

Supplementary Fig. 8 | DNA and CDS sequence mapping of *FPT1* obtained from Col-0 and C24 sequences.



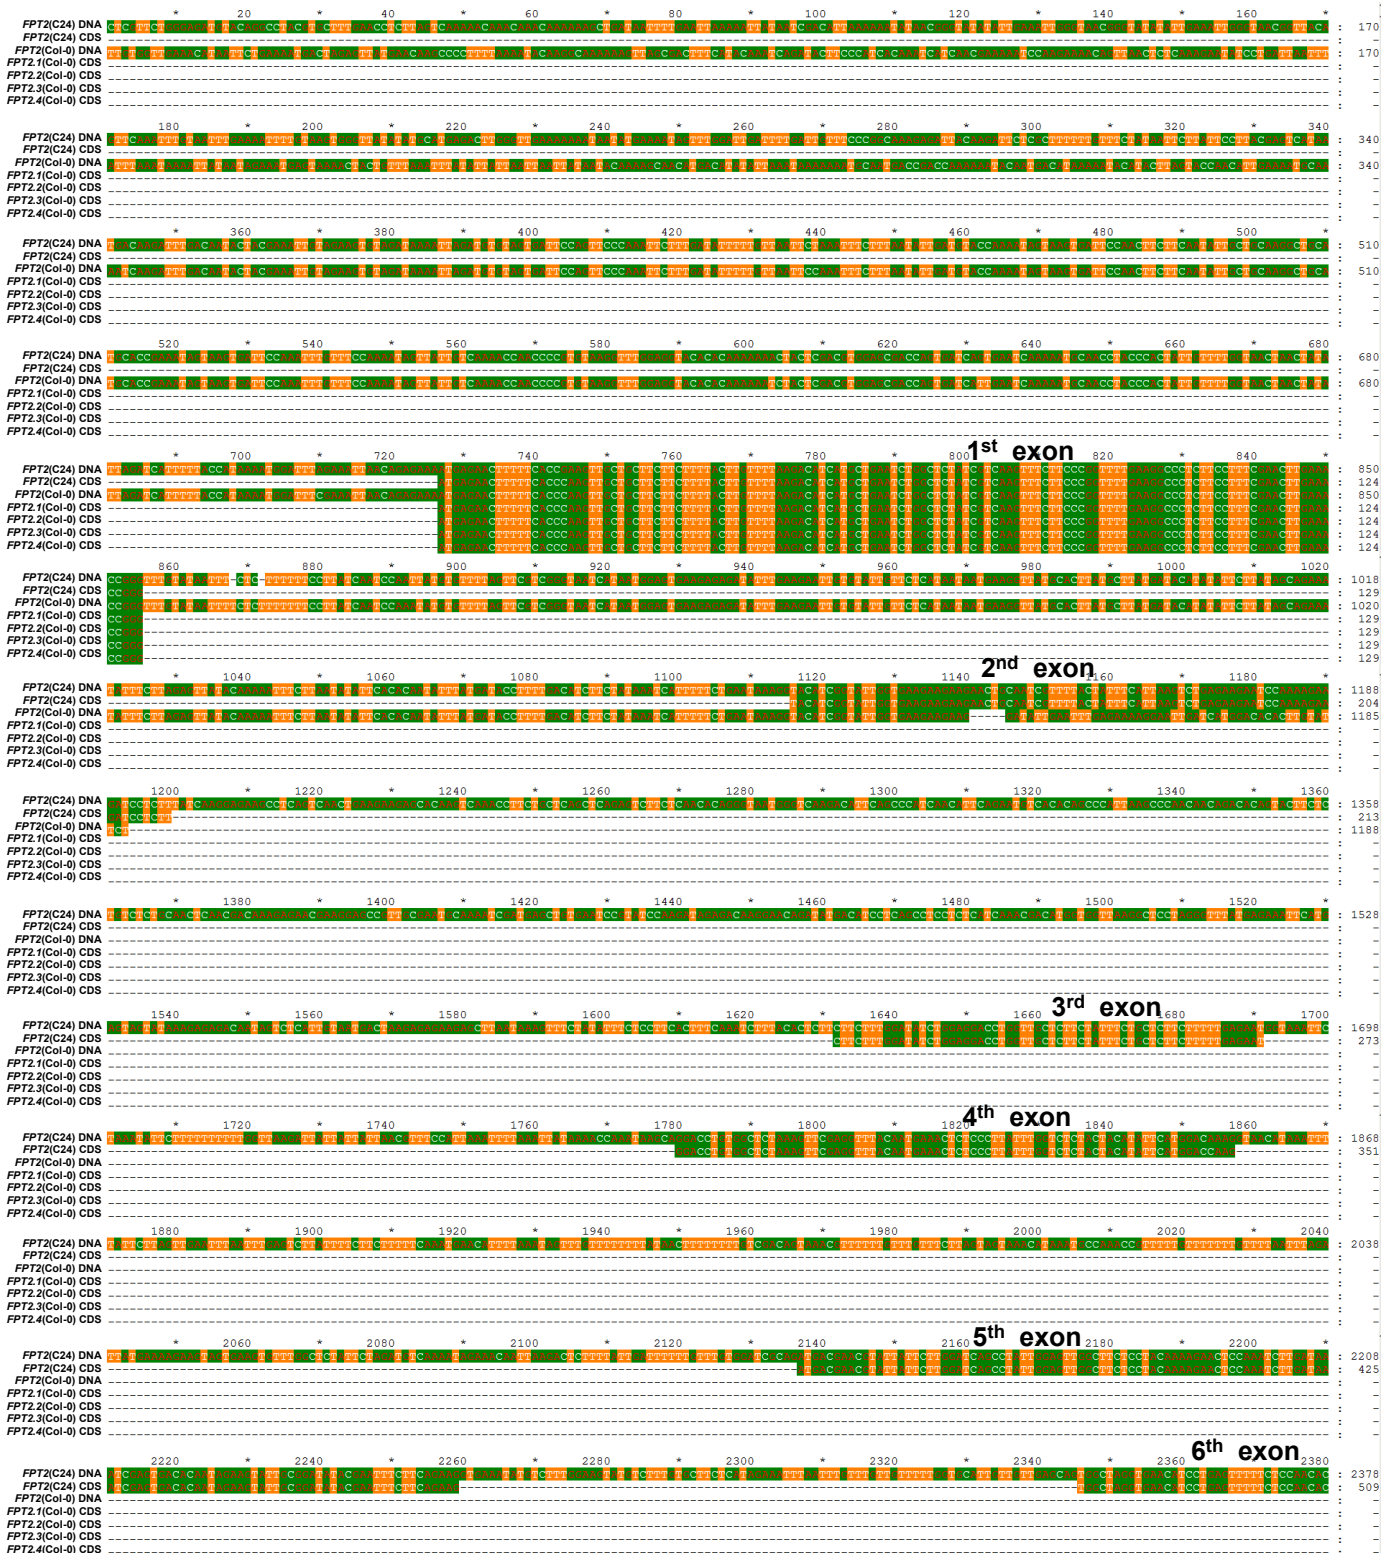

Supplementary Fig. 9a | DNA and CDS sequence mapping of *FPT2* obtained from Col-0 and C24 sequences.

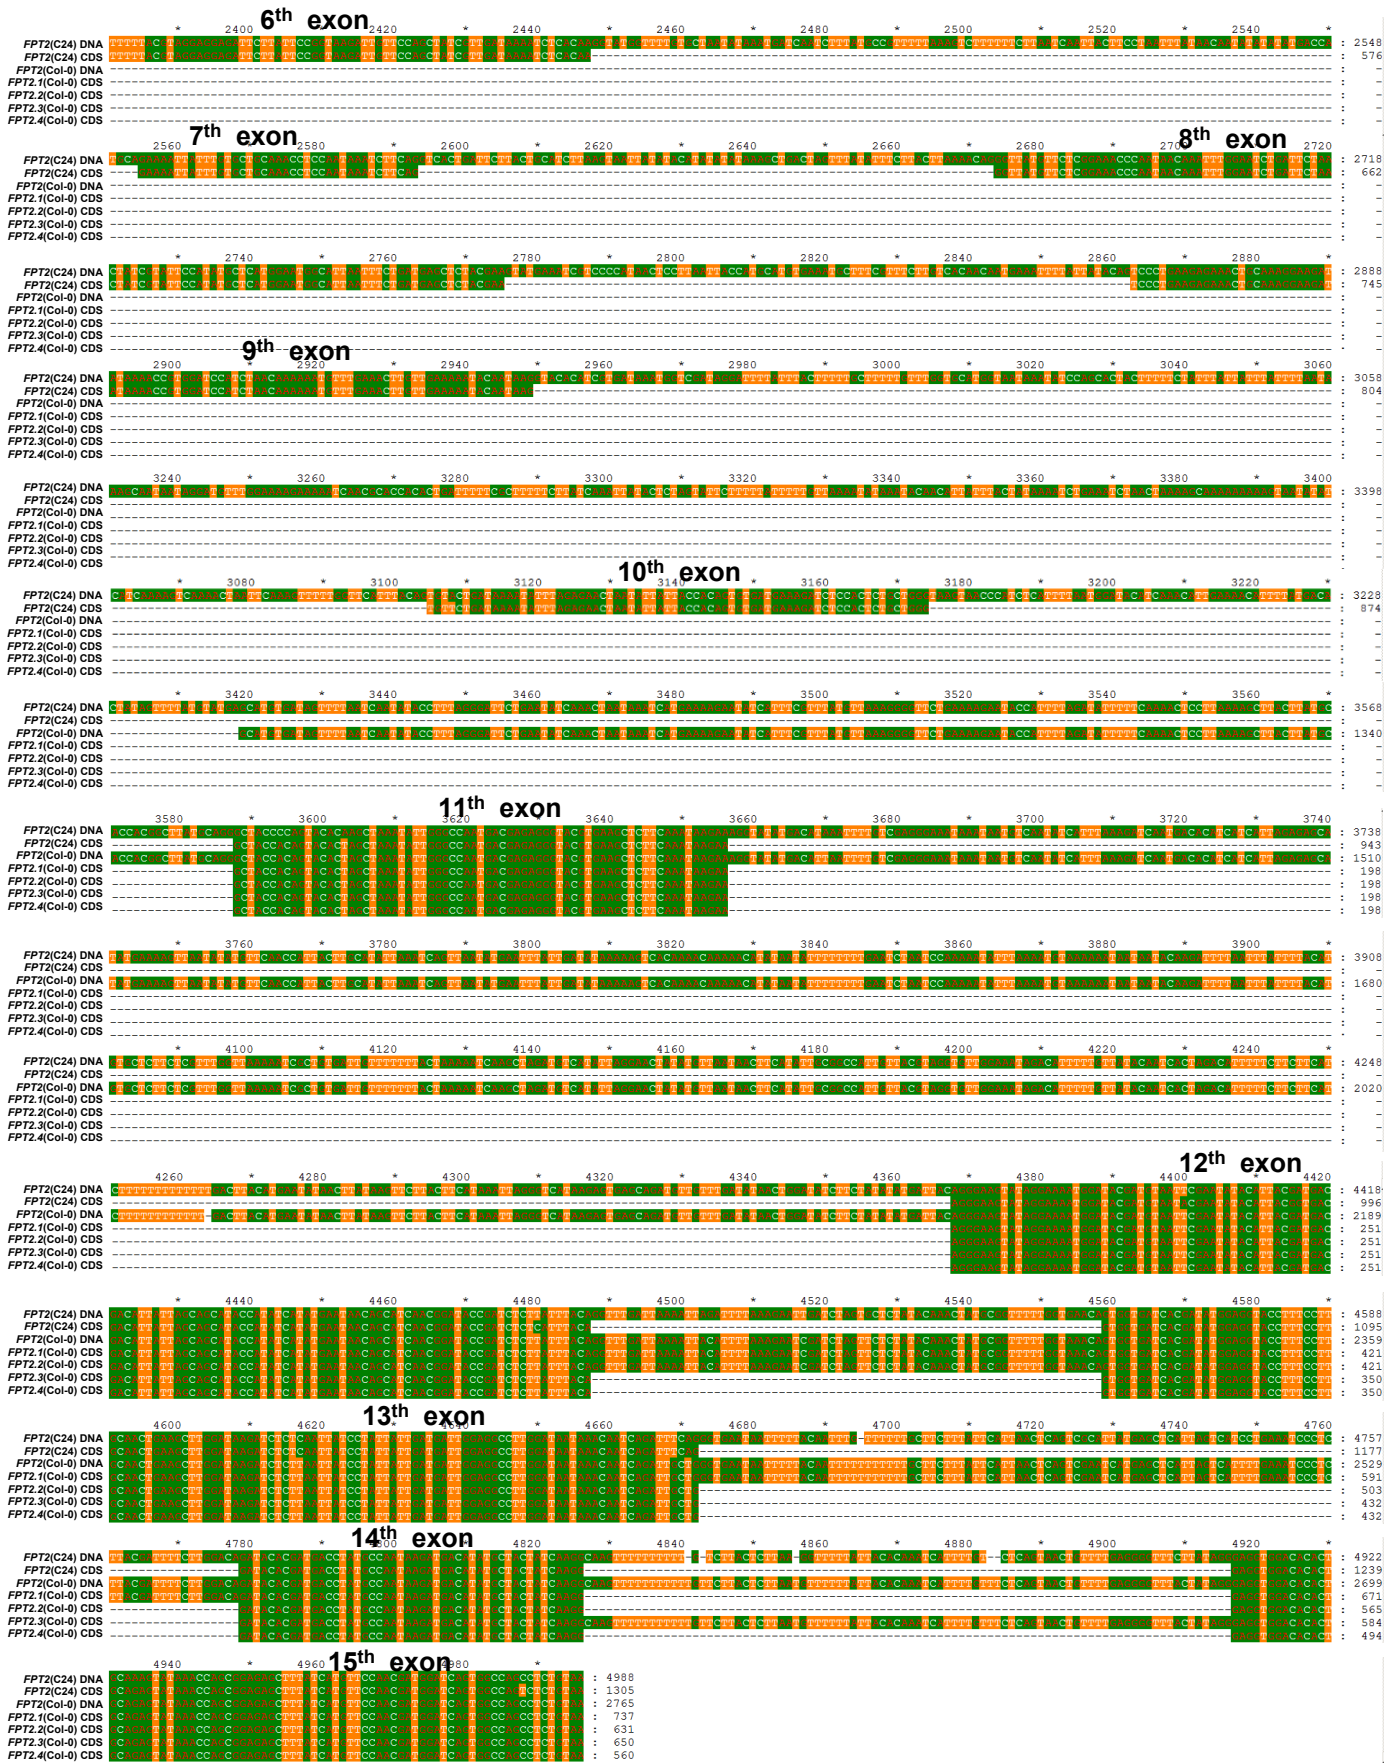

Supplementary Fig. 9b | DNA and CDS sequence mapping of *FPT2* obtained from Col-0 and C24 sequences.

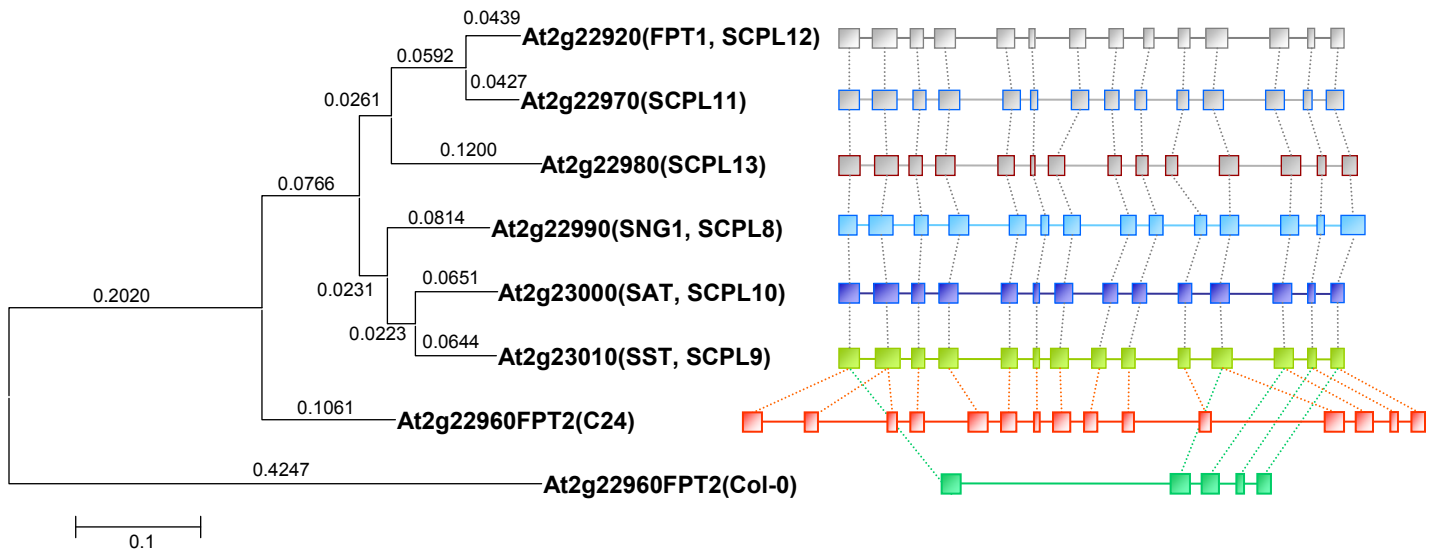

**Supplementary Fig. 10 | Serine carboxypeptidase-like (SCPL) genes located in *FPT* duplicated region of *Arabidopsis thaliana*.**

Amino acid phylogenetic tree analysis of seven *AtSCPL* genes (At2g22920, At2g22960, At2g22970, At2g22980, At2g22990, At2g23000 and At2g23010 of Col-0) in *FPT/SCPL* duplicated region was performed with *FPT2* (At2g22960) sequence obtained from C24 (producer accession). The phylogenetic tree was created using MEGA5.2<sup>60</sup>. Scale implies nucleotide substitutions/site.

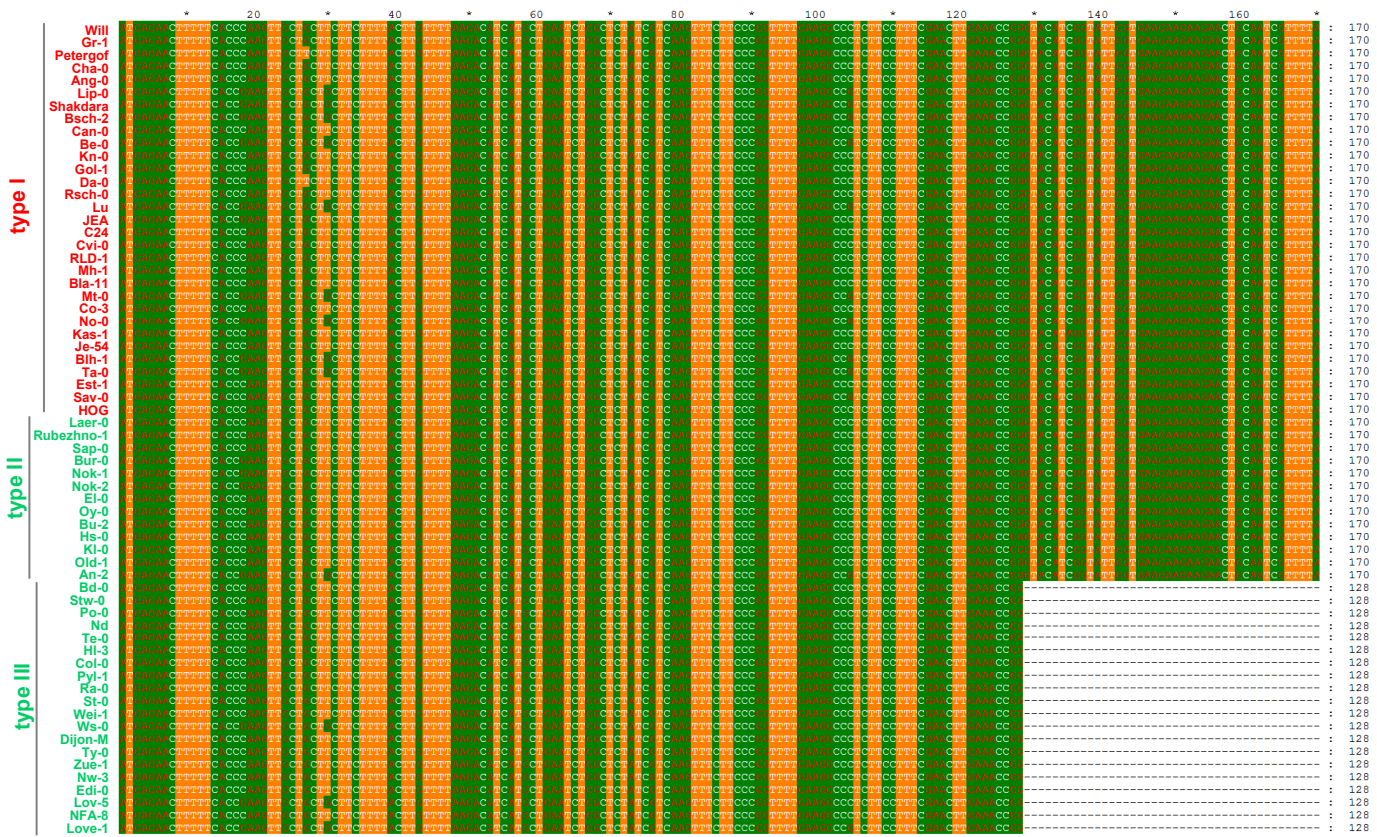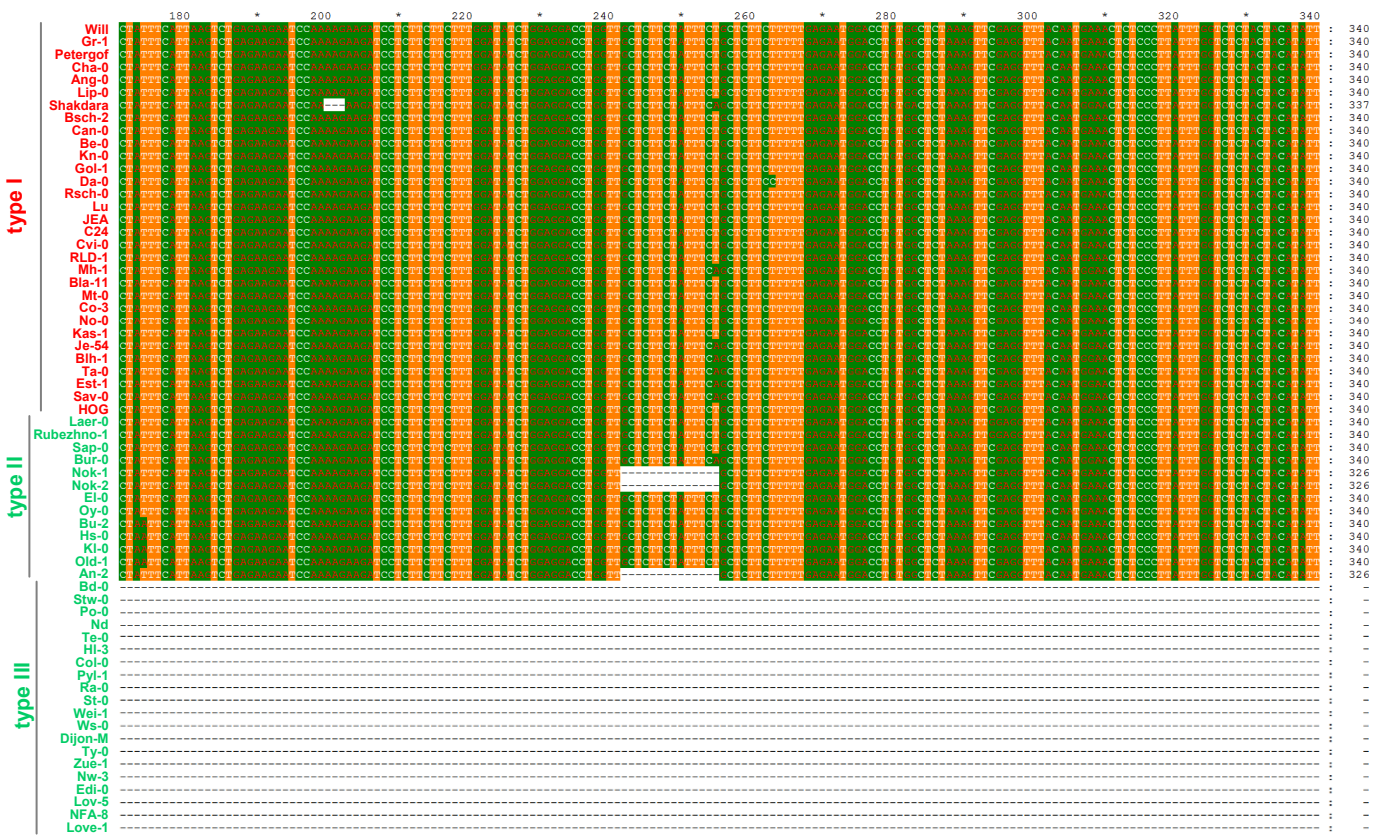

**Supplementary Fig. 11a | CDS alignment of *FPT2* sequenced from 64 accessions.** Obtained sequences were also evaluated and constructed with publically available sequence (Arabidopsis 1001 genome (<http://signal.salk.edu/atg1001/3.0/gebrowser.php>)).

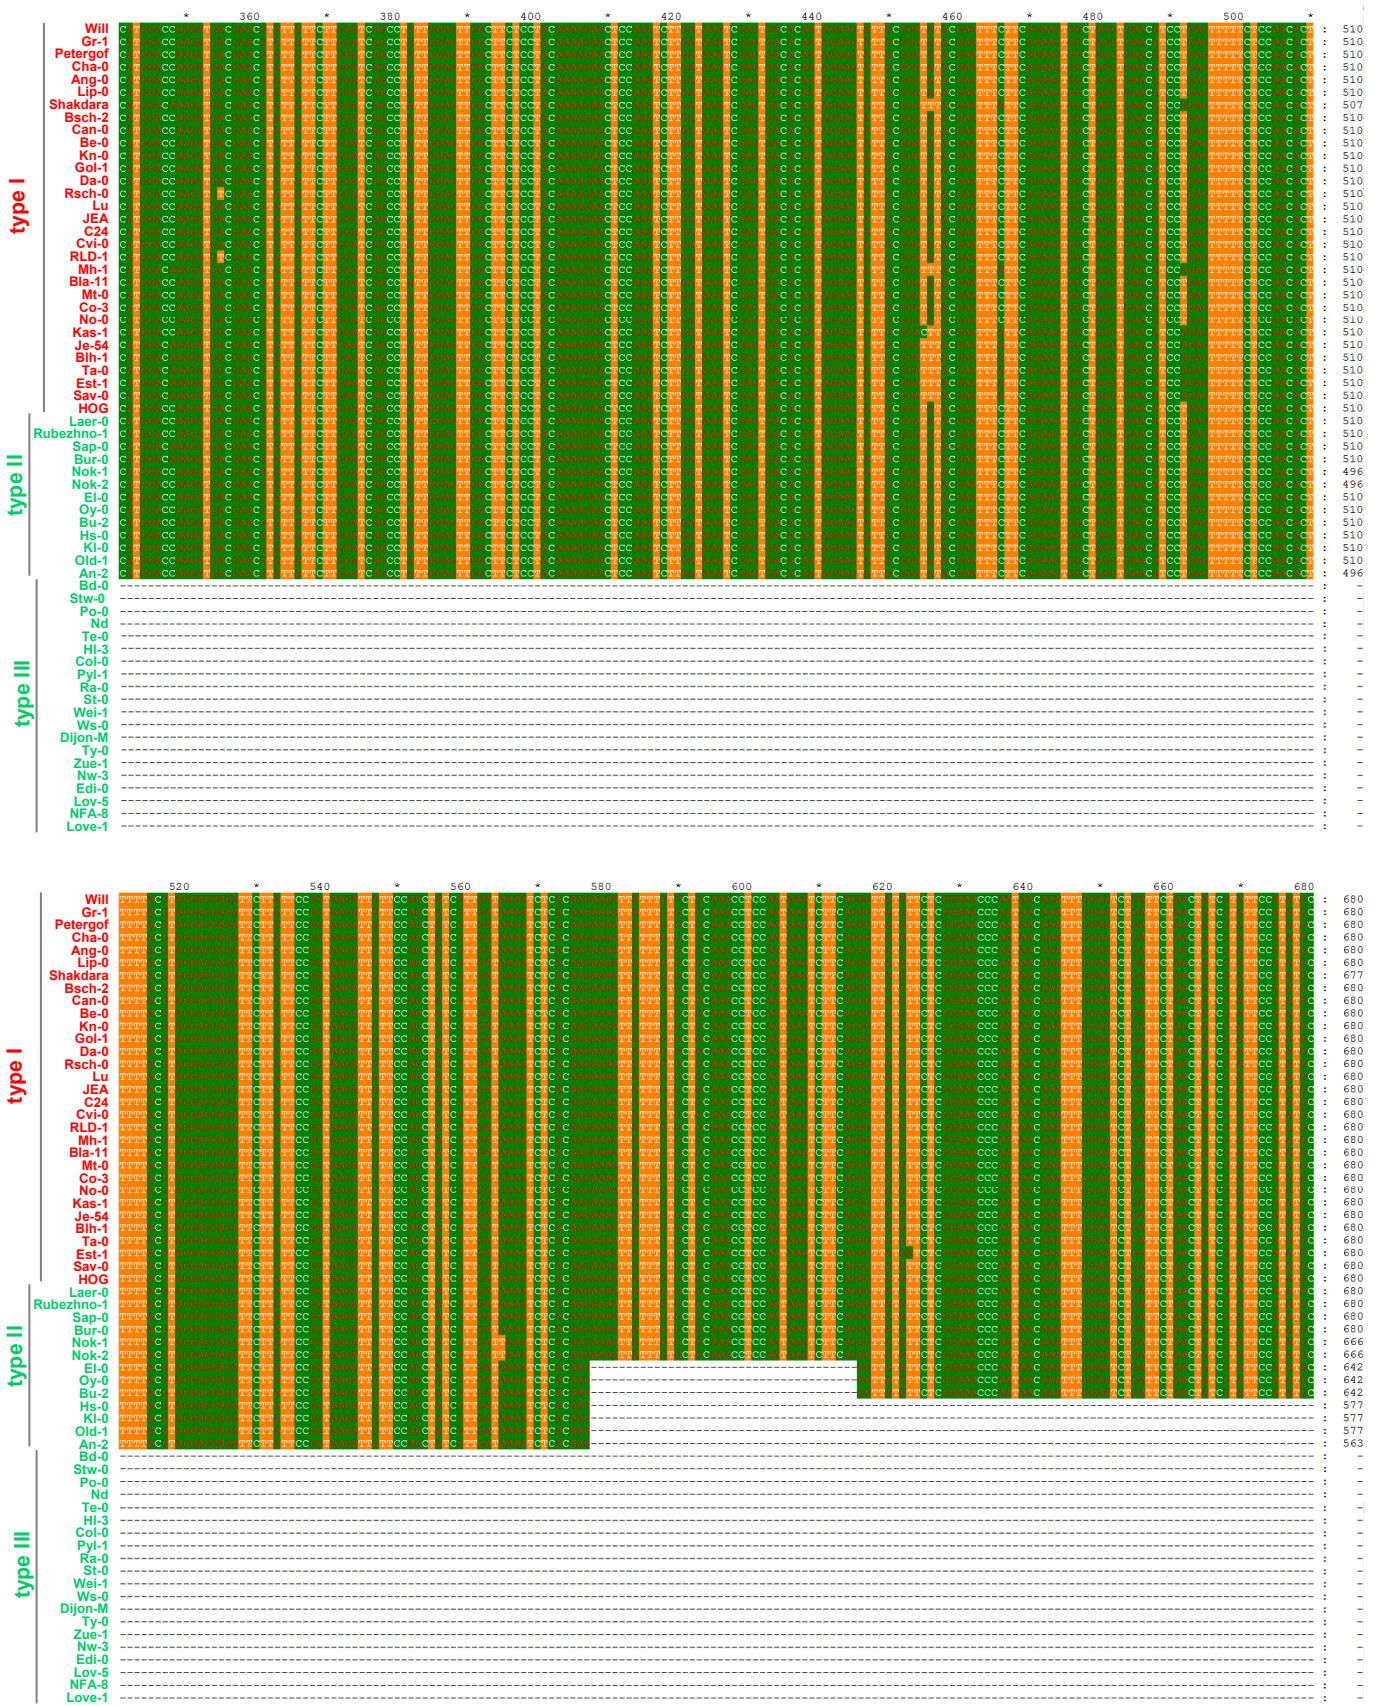

**Supplementary Fig. 11b | CDS alignment of *FPT2* sequenced from 64 accessions.**  
 Obtained sequences were also evaluated and constructed with publicly available sequence (Arabidopsis 1001 genome (<http://signal.salk.edu/atg1001/3.0/gebrowser.php>)).

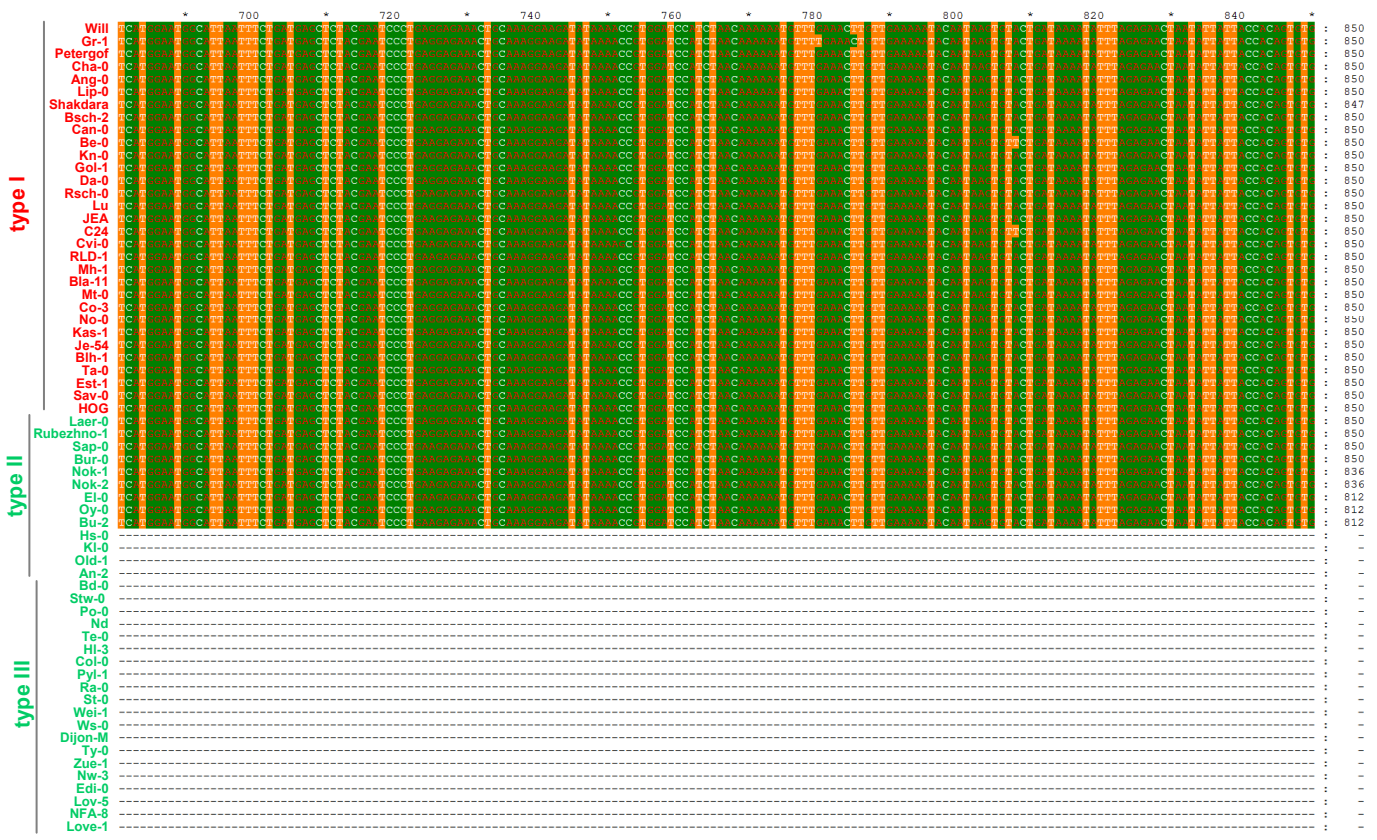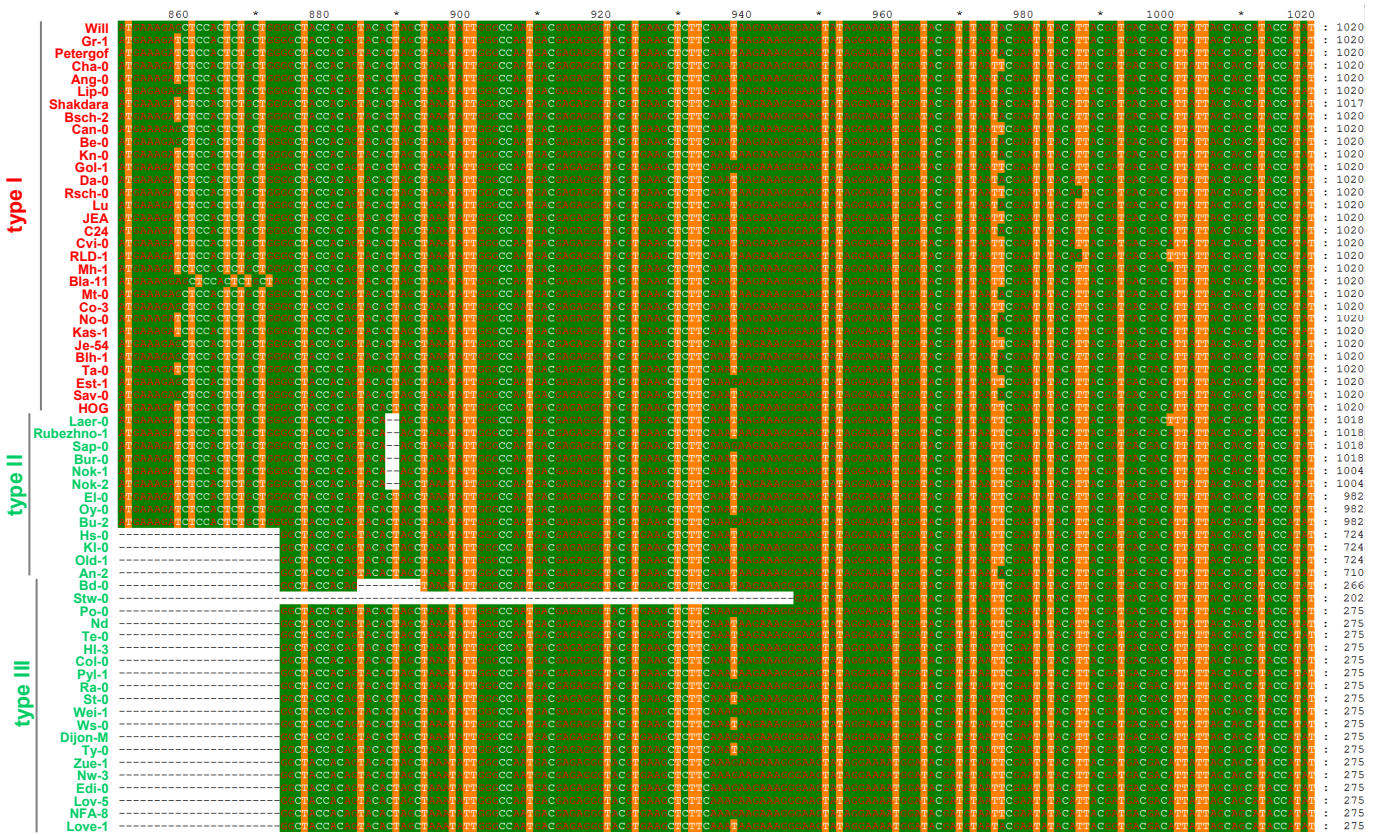

**Supplementary Fig. 11c | CDS alignment of *FPT2* sequenced from 64 accessions.**  
 Obtained sequences were also evaluated and constructed with publically available sequence (Arabidopsis 1001 genome (<http://signal.salk.edu/atg1001/3.0/gebrowser.php>)).

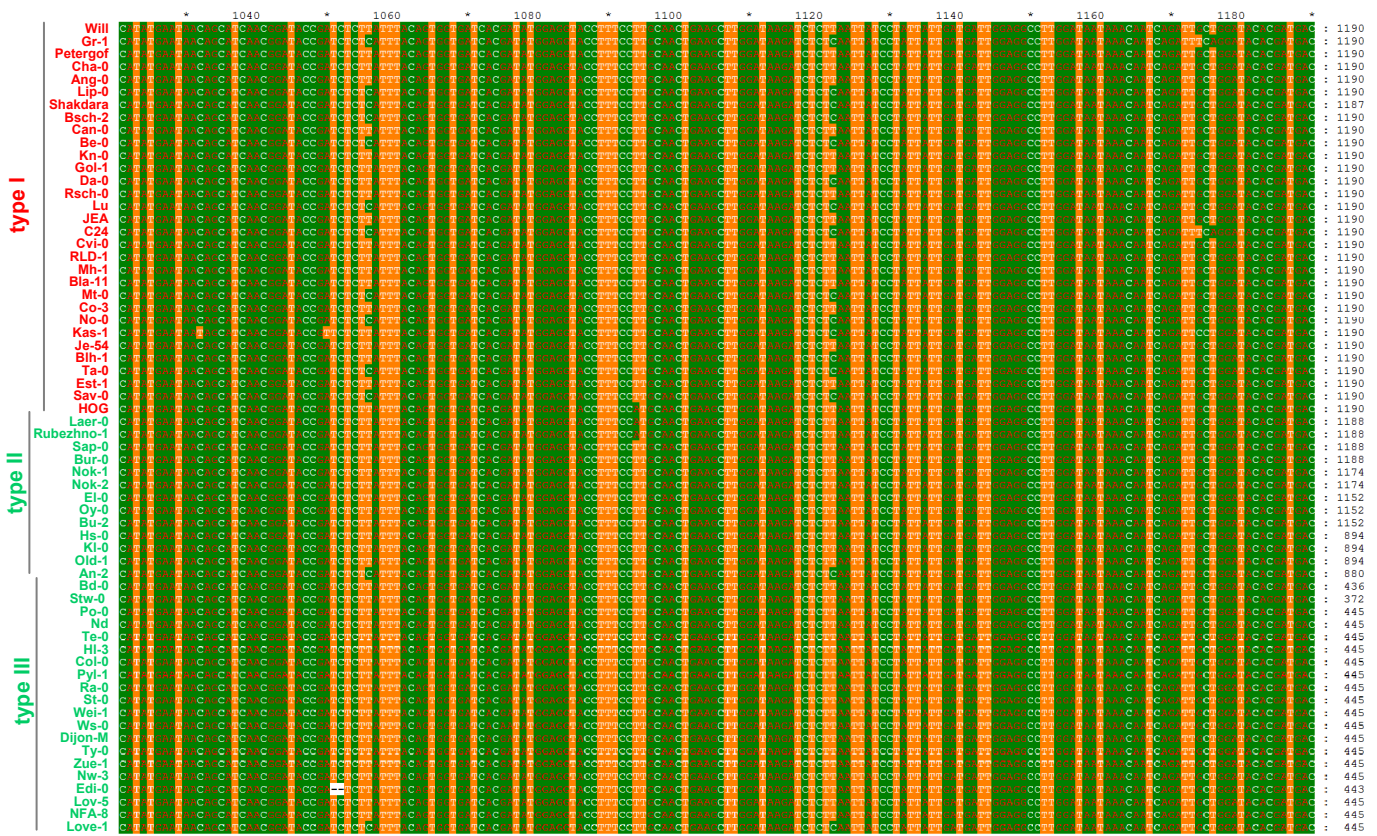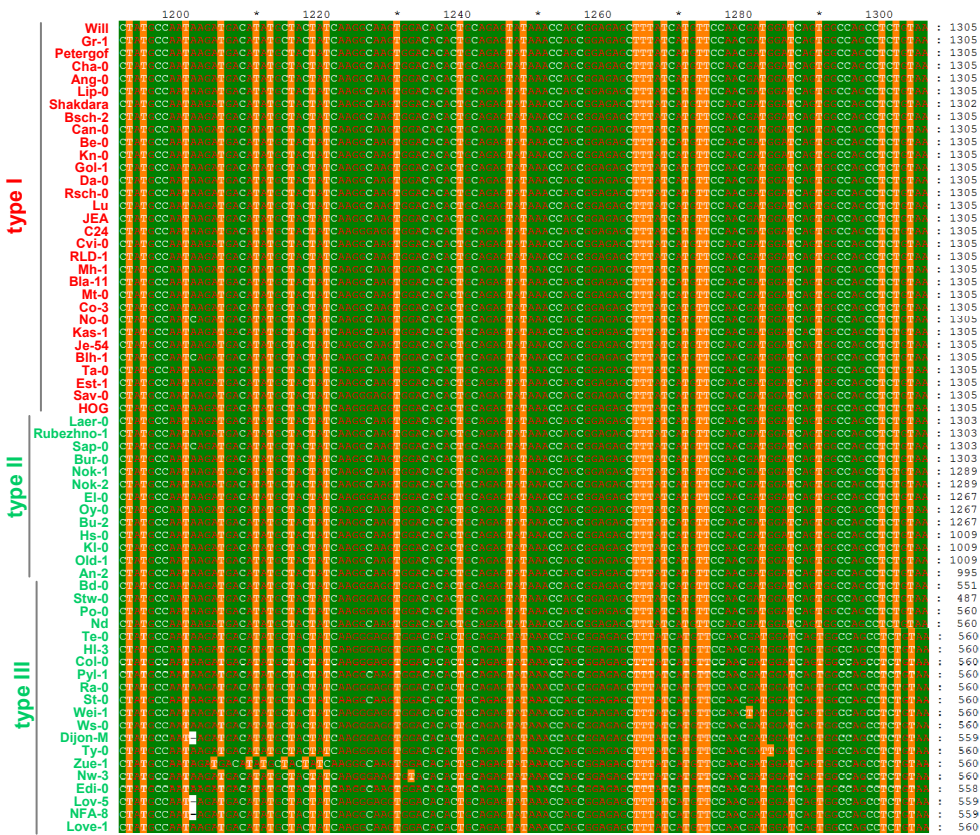

**Supplementary Fig. 11d | CDS alignment of *FPT2* sequenced from 64 accessions.** Obtained sequences were also evaluated and constructed with publicly available sequence (Arabidopsis 1001 genome (<http://signal.salk.edu/atg1001/3.0/gebrowser.php>)).

|                              | Block I    |            | Block II   |           |   |
|------------------------------|------------|------------|------------|-----------|---|
|                              | chromosome | SCPL gene  | chromosome | SCPL gene |   |
| <i>Arabidopsis thaliana</i>  | AtChr.2    | 7          | AtChr. 4   | inverted  | 0 |
| <i>Arabidopsis lyrata</i>    | AlChr.4    | 7          | AlChr.7    |           | 0 |
| <i>Capsella rubella</i>      | CrChr.4    | 9          | CrChr.7    |           | 0 |
| <i>Thellungiella parvula</i> | TpChr.4    | 7          | TpChr.7    | inverted  | 0 |
| <i>Brassica rapa</i>         | BrChr.4    | 1          | BrChr.1    |           | 0 |
|                              | BrChr.9    | inverted 1 | BrChr.3    | inverted  | 0 |
|                              |            |            | BrChr.8    | inverted  | 0 |
| <i>Carica papaya</i>         | -          | -          | -          |           | - |

**Supplementary Fig. 12. Syntenic/intra-syntenic blocks of FPT genomic region found in in Brassicales plants**

SCPL, serine carboxypeptidase-like family genes. "Block I" was defined as syntenic block of FPT genomic region with SCPL genes. "Block II" was defined as intrasyntenic block of FPT syntenic block which do not contain any SCPL genes.



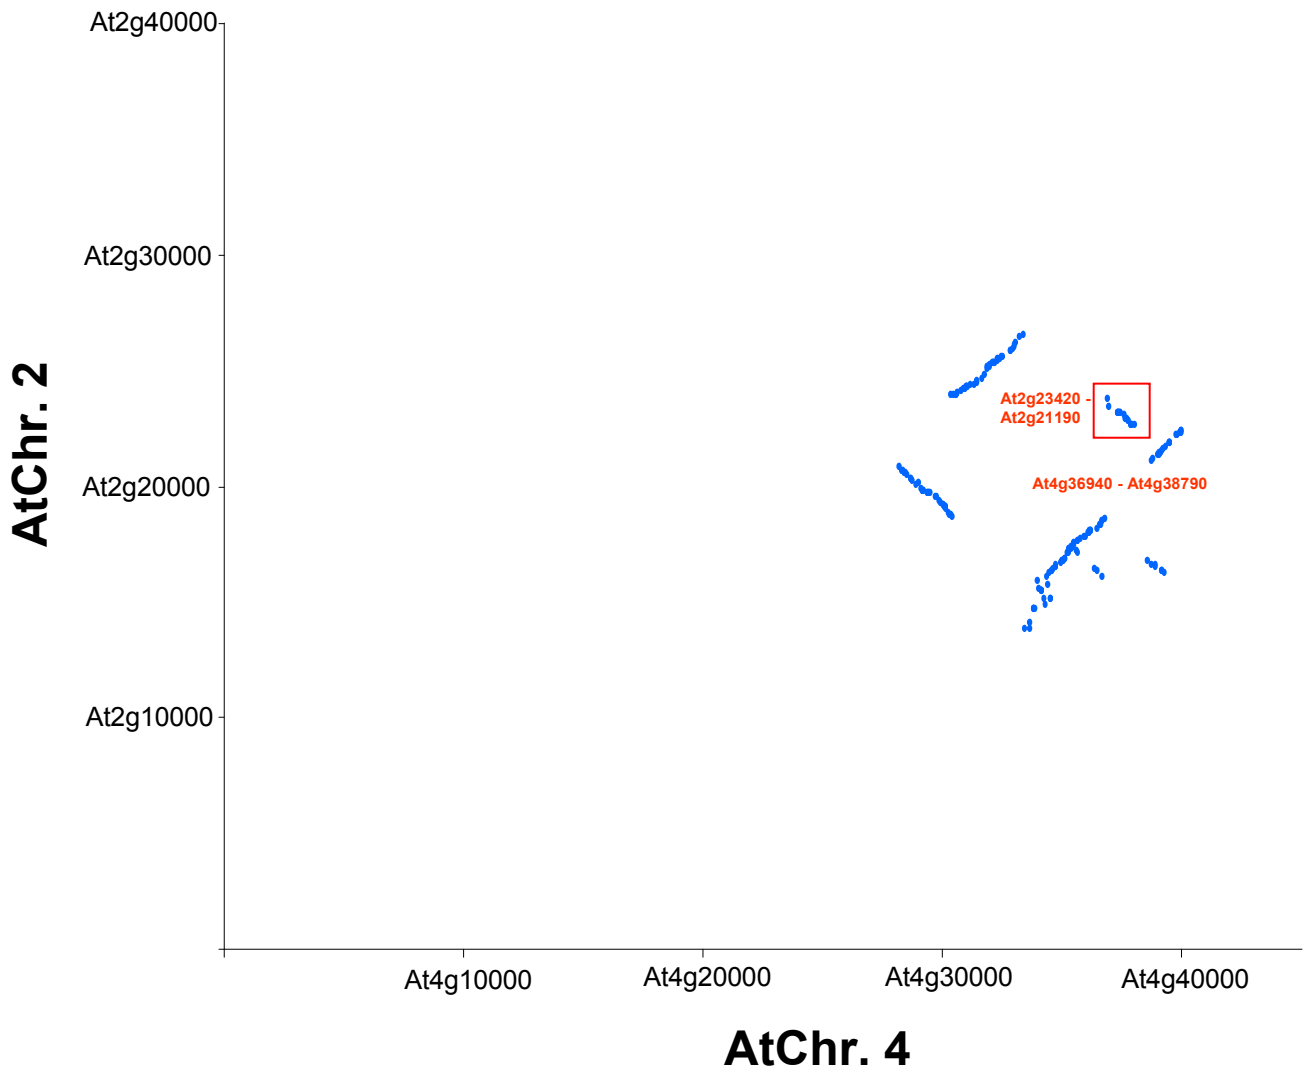

**Supplementary Fig. 13 | Intrasyntenic blocks found between AtChr.2 and AtChr.4 of Arabidopsis.**

*FPT* genes were located in inversed intrasyntenic region between At2g21190-At2g23420 and At4g38790-At4g36940 in *Arabidopsis thaliana*.

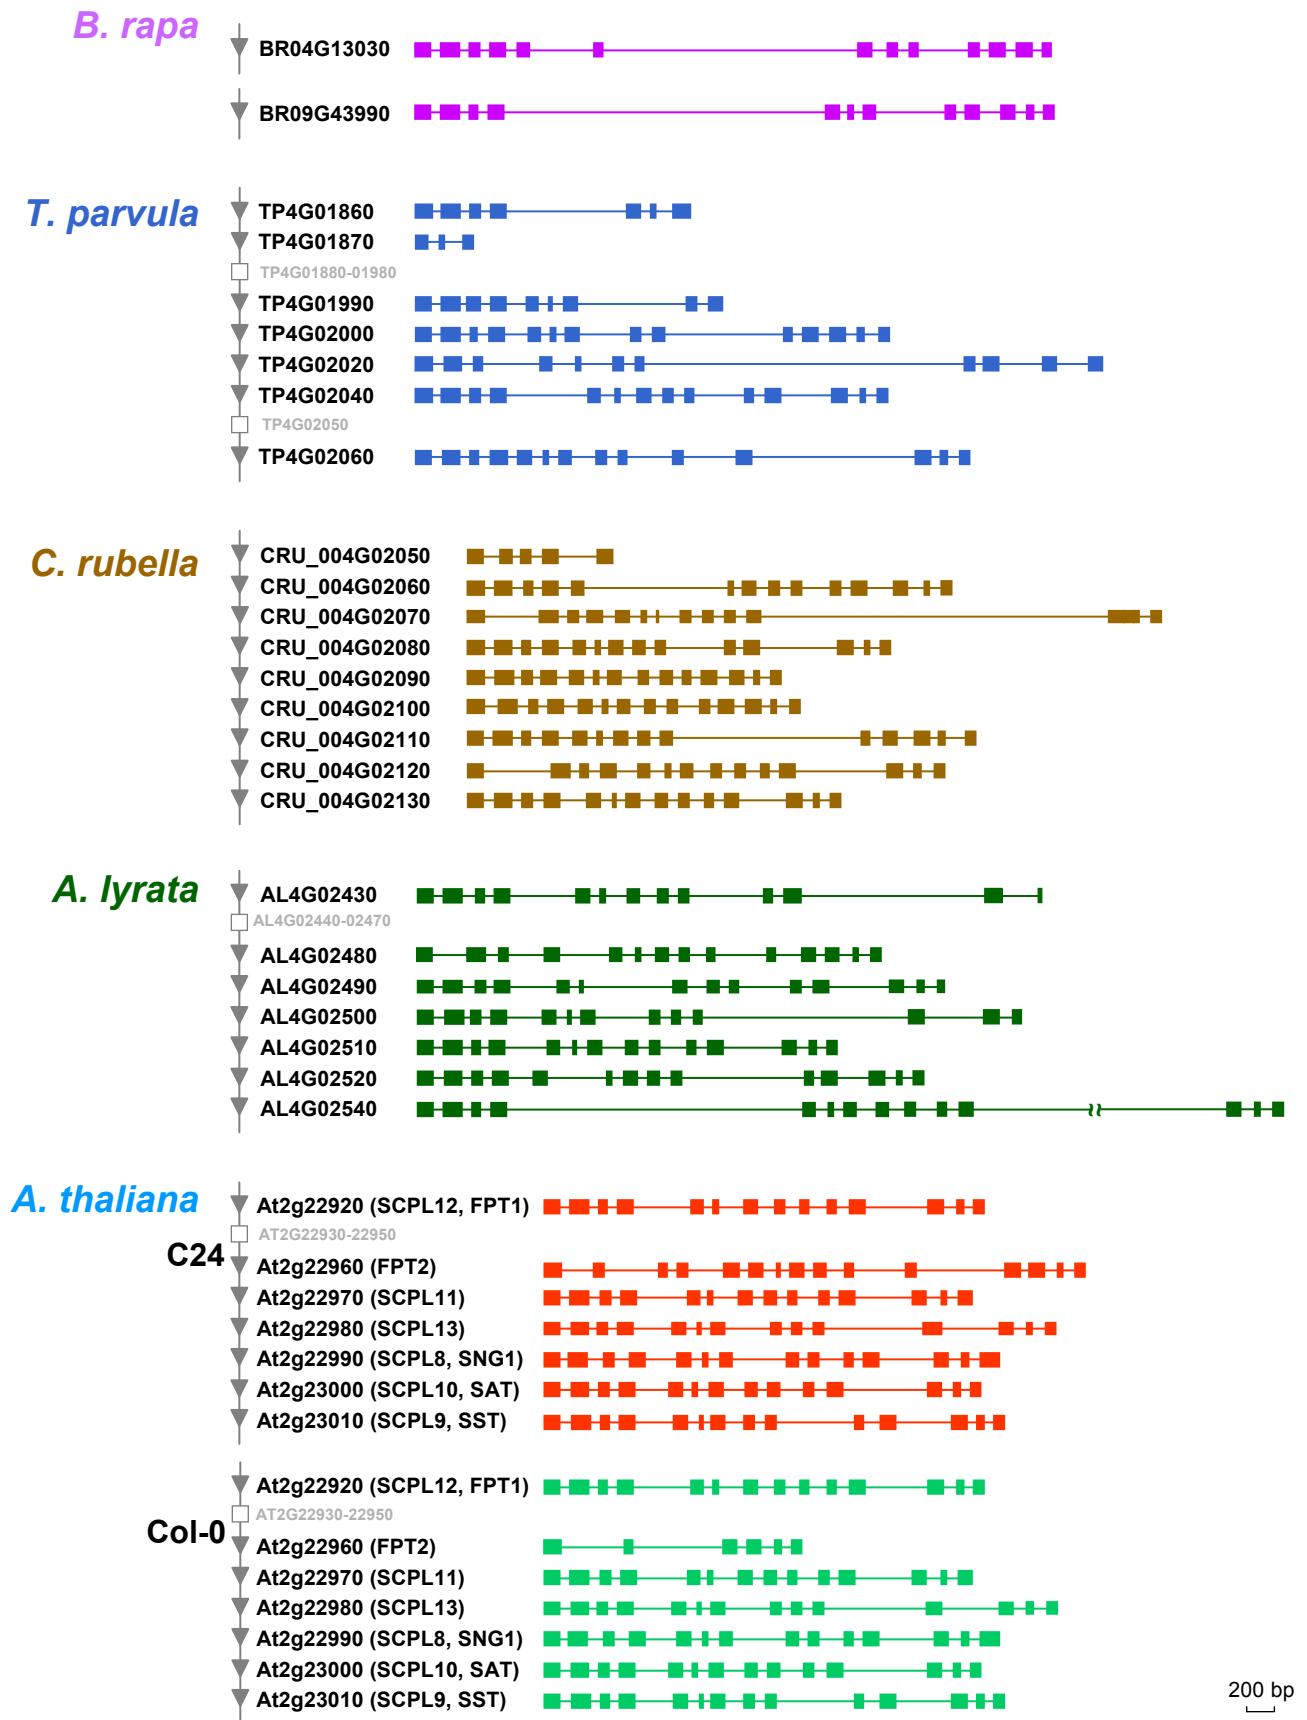

Supplementary Fig. 14 | SCPL genes found in *FPT/SCPL* gene duplicated region in Brassicaceae species.

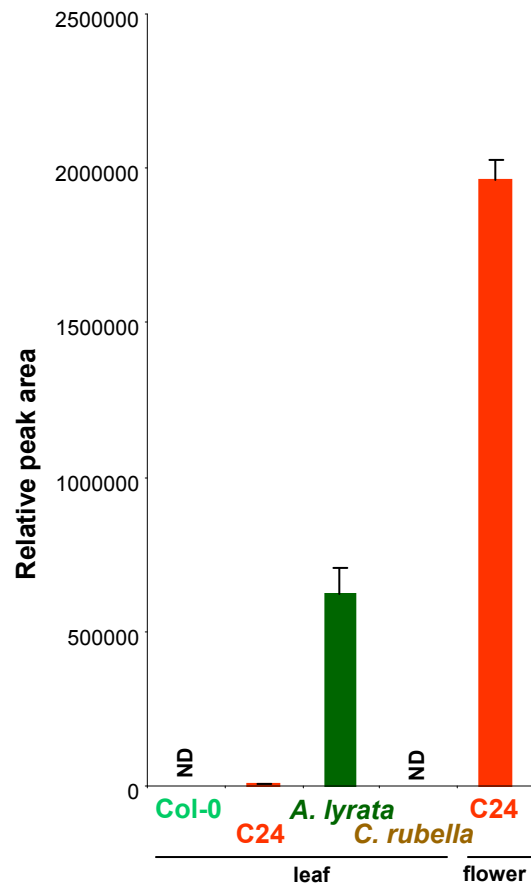

**Supplementary Fig. 15 | Profiling of saiginol A in *A. thaliana*, *A. lyrata* and *C. rubella*.**

LC/MS profiling of content of saiginol A in leaf of *A. thaliana* (Col-0 and C24), *A. lyrata* and *C. rubella*, and flower of *A. thaliana* C24.

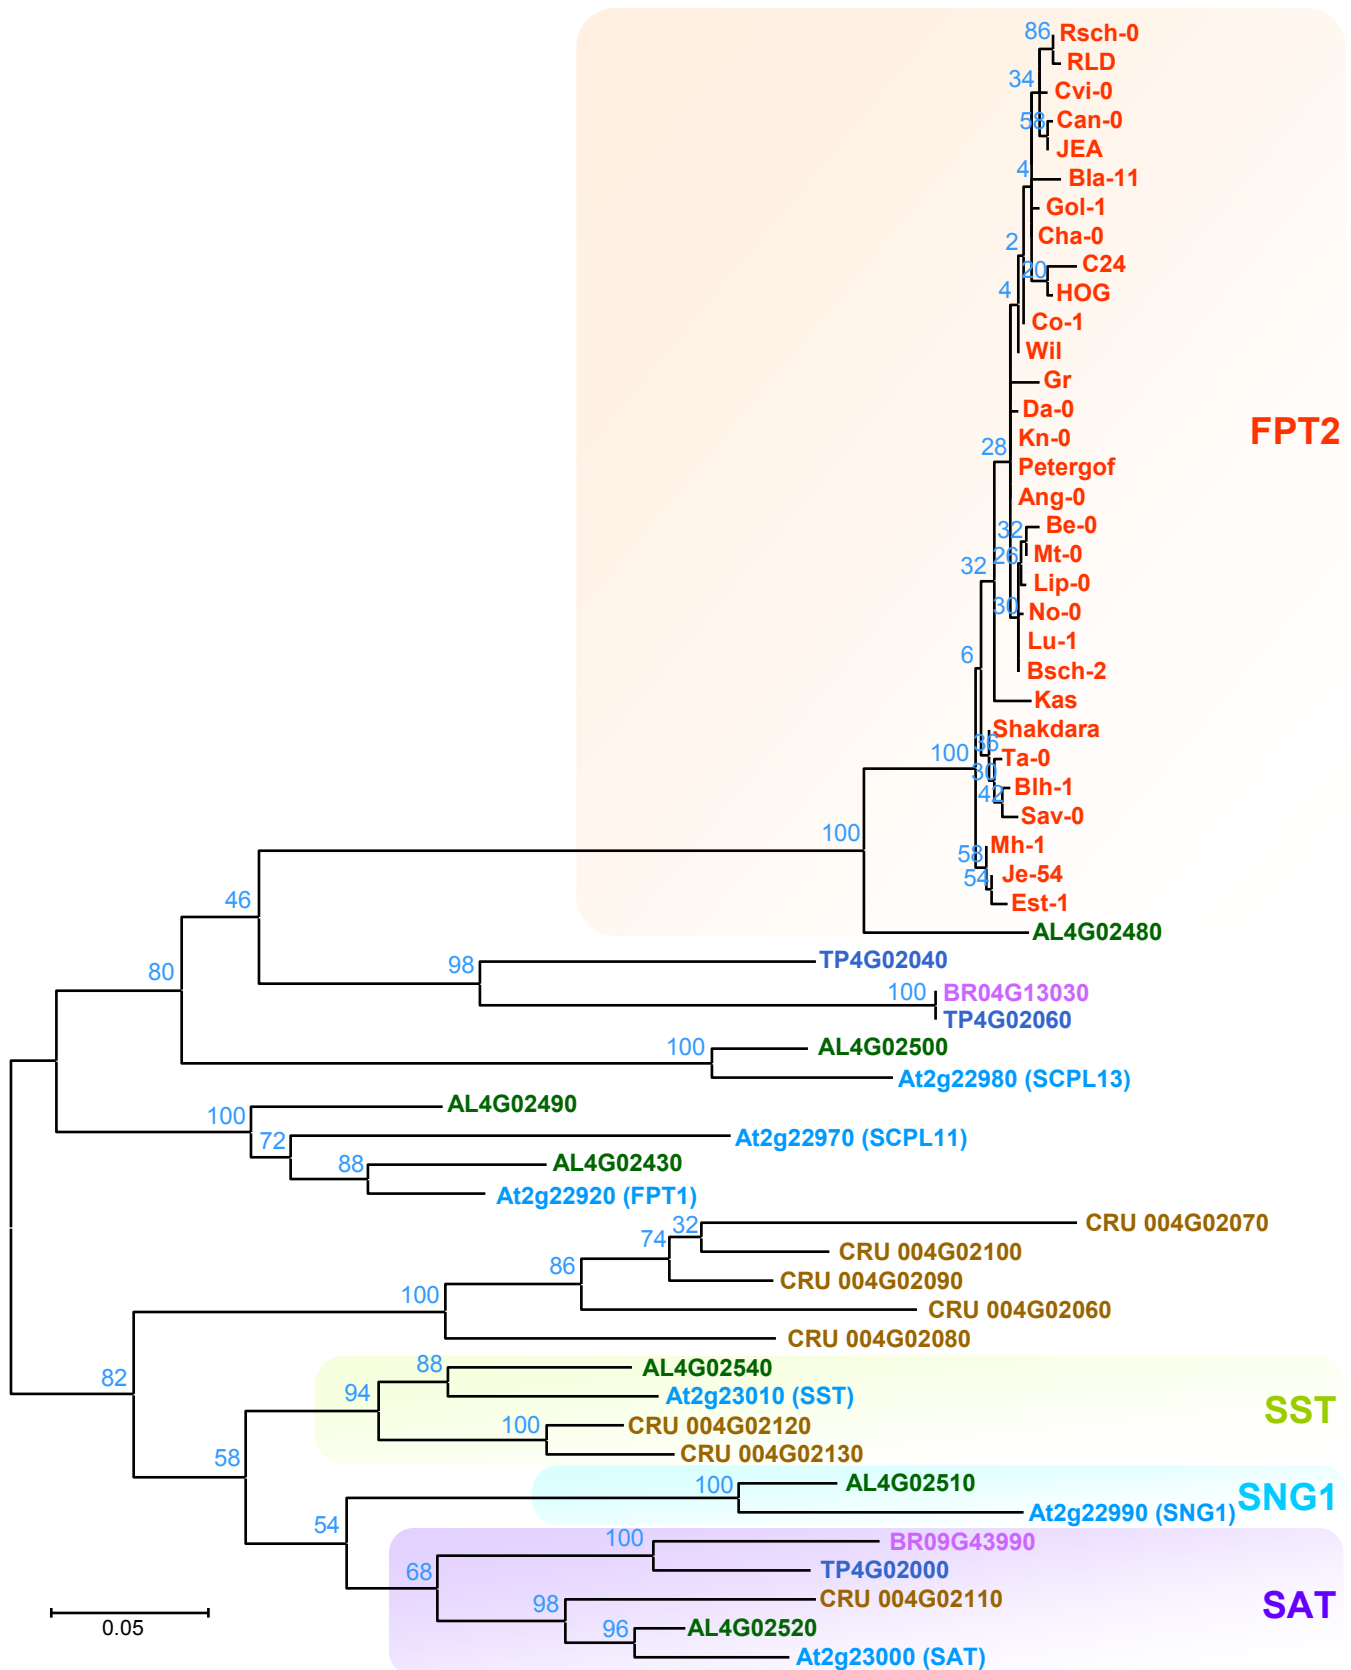

**Supplementary Fig. 16 | Phylogenetic analysis using coding protein sequence of SCPL genes of in syntenic region of Brassicaceae species.**

Phylogenetic analysis using protein sequence of SCPL genes of in syntenic region of Brassicaceae species presented in Figure 5d. The phylogenetic tree was created by ClustalW in MEGA7.0<sup>60</sup> using G-blocks constructed by Gblocks 0.91b in Phylogeny.fr ([http://phylogeny.lirmm.fr/phylo.cgi/one\\_task.cgi?task\\_type=gblocks](http://phylogeny.lirmm.fr/phylo.cgi/one_task.cgi?task_type=gblocks)). The genes of non-producer accessions (type II and III) and with the large deletions (CRU\_004G02050, TP4G01870, TP4G01860, TP4G01990 and TP4G02020) were excluded from this analysis. Scale implies nucleotide substitutions/site.

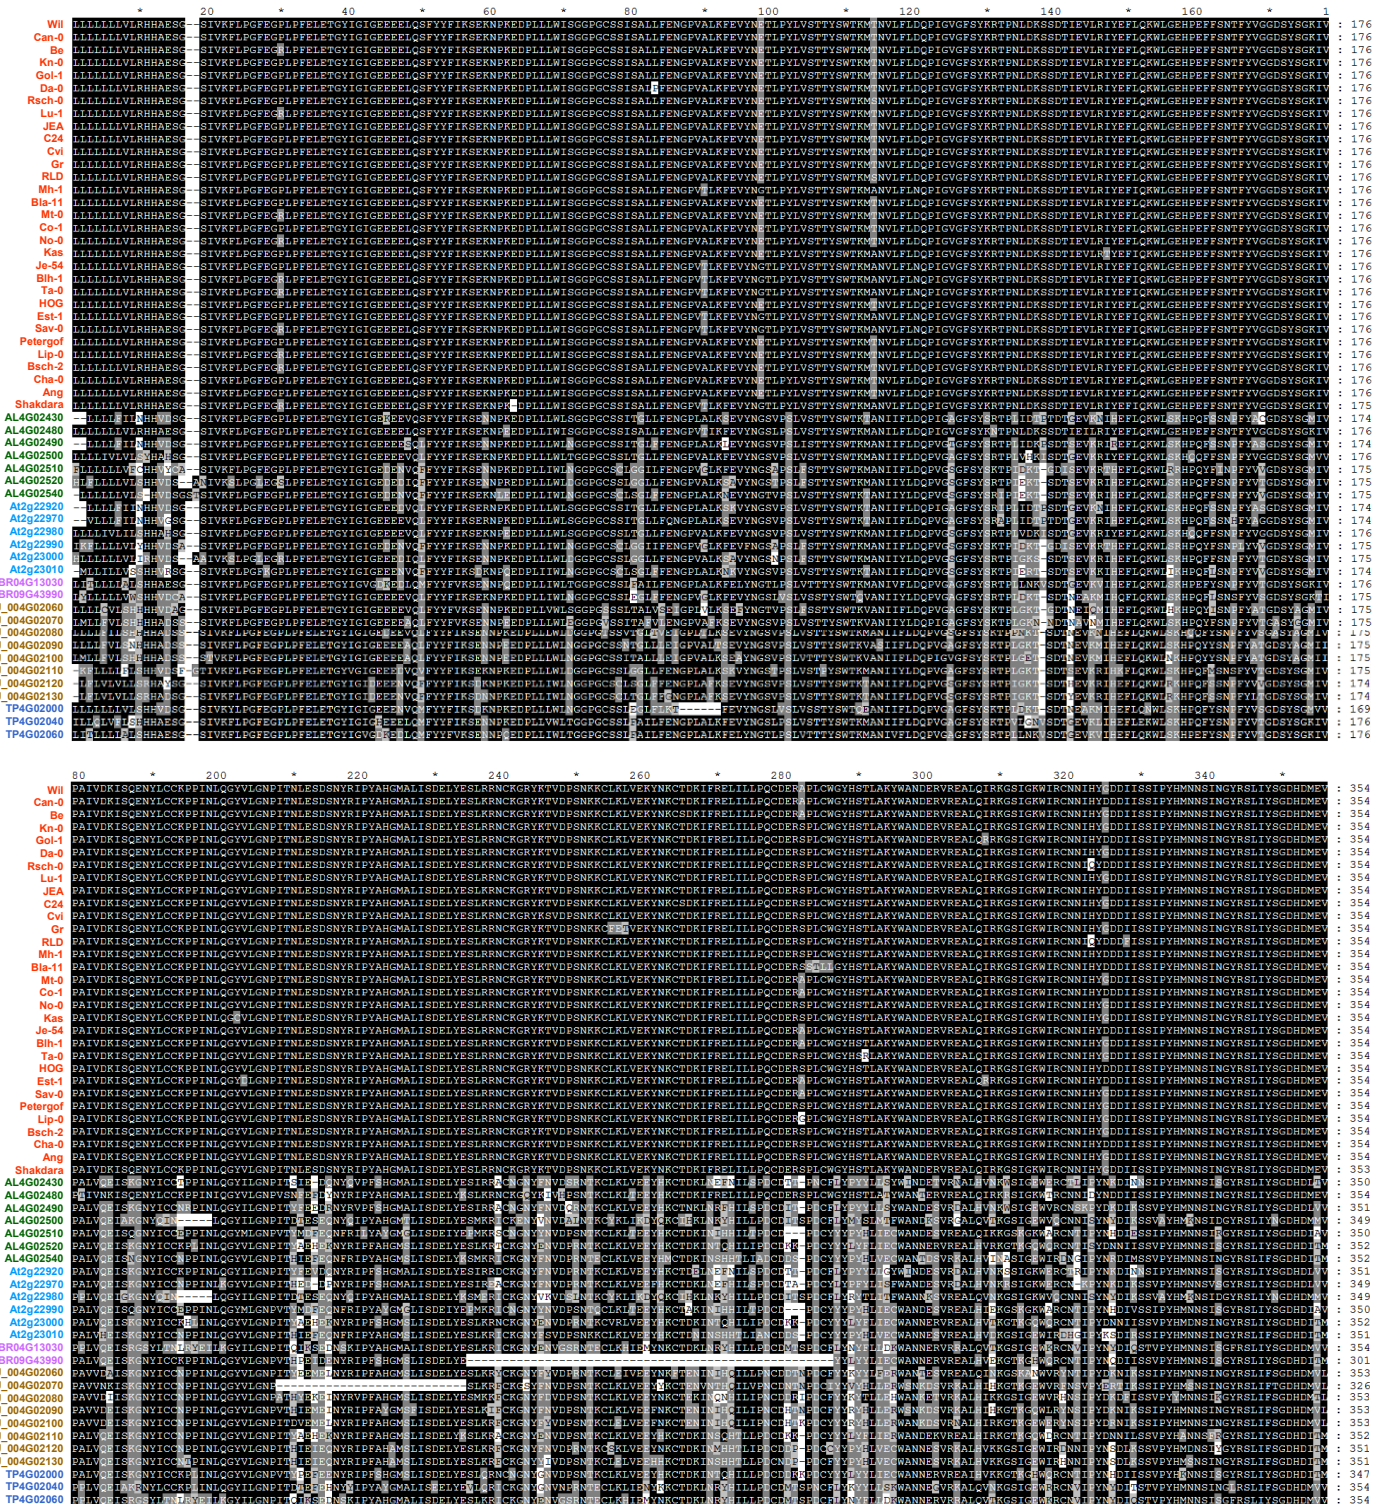

Supplementary Fig. 17a | G-block alignment using coding protein sequence of SCPL genes of in syntenic region of Brassicaceae species.

Sequence alignment was created by ClustalW in MEGA7.0 60 using G-blocks constructed by Gblocks 0.91b in Phylogeny.fr ([http://phylogeny.lirmm.fr/phylo\\_cgi/one\\_task.cgi?task\\_type=gblocks](http://phylogeny.lirmm.fr/phylo_cgi/one_task.cgi?task_type=gblocks)).

```

360      *      380      *      400      *      420
Wii PFLATEAWIRSLNVPIDDRPWIINQIAGYMTYANKMPTATIKASGHTAEYKPAESFIMFQRWISGQPL : 426
Coh-0 PFLATEAWIRSLNVPIDDRPWIINQIAGYMTYANKMPTATIKASGHTAEYKPAESFIMFQRWISGQPL : 426
Be PFLATEAWIRSLNVPIDDRPWIINQIAGYMTYANKMPTATIKASGHTAEYKPAESFIMFQRWISGQPL : 426
Kn-0 PFLATEAWIRSLNVPIDDRPWIINQIAGYMTYANKMPTATIKASGHTAEYKPAESFIMFQRWISGQPL : 426
Gol-1 PFLATEAWIRSLNVPIDDRPWIINQIAGYMTYANKMPTATIKASGHTAEYKPAESFIMFQRWISGQPL : 426
Da-0 PFLATEAWIRSLNVPIDDRPWIINQIAGYMTYANKMPTATIKASGHTAEYKPAESFIMFQRWISGQPL : 426
Rsch-0 PFLATEAWIRSLNVPIDDRPWIINQIAGYMTYANKMPTATIKASGHTAEYKPAESFIMFQRWISGQPL : 426
Lu-1 PFLATEAWIRSLNVPIDDRPWIINQIAGYMTYANKMPTATIKASGHTAEYKPAESFIMFQRWISGQPL : 426
JEA PFLATEAWIRSLNVPIDDRPWIINQIAGYMTYANKMPTATIKASGHTAEYKPAESFIMFQRWISGQPL : 426
C24 PFLATEAWIRSLNVPIDDRPWIINQIAGYMTYANKMPTATIKASGHTAEYKPAESFIMFQRWISGQPL : 426
Cvi PFLATEAWIRSLNVPIDDRPWIINQIAGYMTYANKMPTATIKASGHTAEYKPAESFIMFQRWISGQPL : 426
Gr PFLATEAWIRSLNVPIDDRPWIINQIAGYMTYANKMPTATIKASGHTAEYKPAESFIMFQRWISGQPL : 426
RLD PFLATEAWIRSLNVPIDDRPWIINQIAGYMTYANKMPTATIKASGHTAEYKPAESFIMFQRWISGQPL : 426
Mh-1 PFLATEAWIRSLNVPIDDRPWIINQIAGYMTYANKMPTATIKASGHTAEYKPAESFIMFQRWISGQPL : 426
Bla-11 PFLATEAWIRSLNVPIDDRPWIINQIAGYMTYANKMPTATIKASGHTAEYKPAESFIMFQRWISGQPL : 426
Mt-0 PFLATEAWIRSLNVPIDDRPWIINQIAGYMTYANKMPTATIKASGHTAEYKPAESFIMFQRWISGQPL : 426
Co-1 PFLATEAWIRSLNVPIDDRPWIINQIAGYMTYANKMPTATIKASGHTAEYKPAESFIMFQRWISGQPL : 426
No-0 PFLATEAWIRSLNVPIDDRPWIINQIAGYMTYANKMPTATIKASGHTAEYKPAESFIMFQRWISGQPL : 426
Kas PFLATEAWIRSLNVPIDDRPWIINQIAGYMTYANKMPTATIKASGHTAEYKPAESFIMFQRWISGQPL : 426
Je-54 PFLATEAWIRSLNVPIDDRPWIINQIAGYMTYANKMPTATIKASGHTAEYKPAESFIMFQRWISGQPL : 426
Bli-1 PFLATEAWIRSLNVPIDDRPWIINQIAGYMTYANKMPTATIKASGHTAEYKPAESFIMFQRWISGQPL : 426
Ts-0 PFLATEAWIRSLNVPIDDRPWIINQIAGYMTYANKMPTATIKASGHTAEYKPAESFIMFQRWISGQPL : 426
HOG PFLATEAWIRSLNVPIDDRPWIINQIAGYMTYANKMPTATIKASGHTAEYKPAESFIMFQRWISGQPL : 426
Est-1 PFLATEAWIRSLNVPIDDRPWIINQIAGYMTYANKMPTATIKASGHTAEYKPAESFIMFQRWISGQPL : 426
Sav-0 PFLATEAWIRSLNVPIDDRPWIINQIAGYMTYANKMPTATIKASGHTAEYKPAESFIMFQRWISGQPL : 426
Peturge PFLATEAWIRSLNVPIDDRPWIINQIAGYMTYANKMPTATIKASGHTAEYKPAESFIMFQRWISGQPL : 426
Lip-0 PFLATEAWIRSLNVPIDDRPWIINQIAGYMTYANKMPTATIKASGHTAEYKPAESFIMFQRWISGQPL : 426
Bsch-2 PFLATEAWIRSLNVPIDDRPWIINQIAGYMTYANKMPTATIKASGHTAEYKPAESFIMFQRWISGQPL : 426
Cha-0 PFLATEAWIRSLNVPIDDRPWIINQIAGYMTYANKMPTATIKASGHTAEYKPAESFIMFQRWISGQPL : 426
Ang PFLATEAWIRSLNVPIDDRPWIINQIAGYMTYANKMPTATIKASGHTAEYKPAESFIMFQRWISGQPL : 426
Shakira PFLATEAWIRSLNVPIDDRPWIINQIAGYMTYANKMPTATIKASGHTAEYKPAESFIMFQRWISGQPL : 425
AL4G02430 PFLATCAWIKSLNVPIDDRPWIINQIAGYMTYANKMPTATIKASGHTAEYKPAESFIMFQRWISGQPL : 393
AL4G02480 PFLATEAWIRSLNVPIDDRPWIINQIAGYMTYANKMPTATIKASGHTAEYKPAESFIMFQRWISGQPL : 426
AL4G02490 PFLATCAWIKSLNVPIDDRPWIINQIAGYMTYANKMPTATIKASGHTAEYKPAESFIMFQRWISGQPL : 419
AL4G02500 PFLATCAWIKSLNVPIDDRPWIINQIAGYMTYANKMPTATIKASGHTAEYKPAESFIMFQRWISGQPL : 402
AL4G02510 PFLATCAWIKSLNVPIDDRPWIINQIAGYMTYANKMPTATIKASGHTAEYKPAESFIMFQRWISGQPL : 422
AL4G02520 PFLATCAWIKSLNVPIDDRPWIINQIAGYMTYANKMPTATIKASGHTAEYKPAESFIMFQRWISGQPL : 424
AL4G02540 PFLATCAWIKSLNVPIDDRPWIINQIAGYMTYANKMPTATIKASGHTAEYKPAESFIMFQRWISGQPL : 422
At2g22920 PFLATCAWIKSLNVPIDDRPWIINQIAGYMTYANKMPTATIKASGHTAEYKPAESFIMFQRWISGQPL : 423
At2g22970 PFLATCAWIKSLNVPIDDRPWIINQIAGYMTYANKMPTATIKASGHTAEYKPAESFIMFQRWISGQPL : 421
At2g22980 PFLATCAWIKSLNVPIDDRPWIINQIAGYMTYANKMPTATIKASGHTAEYKPAESFIMFQRWISGQPL : 421
At2g22990 PFLATCAWIKSLNVPIDDRPWIINQIAGYMTYANKMPTATIKASGHTAEYKPAESFIMFQRWISGQPL : 422
At2g23000 PFLATCAWIKSLNVPIDDRPWIINQIAGYMTYANKMPTATIKASGHTAEYKPAESFIMFQRWISGQPL : 424
At2g23010 PFLATCAWIKSLNVPIDDRPWIINQIAGYMTYANKMPTATIKASGHTAEYKPAESFIMFQRWISGQPL : 423
BR04G13030 PFLATCAWIKSLNVPIDDRPWIINQIAGYMTYANKMPTATIKASGHTAEYKPAESFIMFQRWISGQPL : 407
BR04G13990 PFLATCAWIKSLNVPIDDRPWIINQIAGYMTYANKMPTATIKASGHTAEYKPAESFIMFQRWISGQPL : 373
CRU_004G02060 PFLATEAWIKSLNVPIDDRPWIINQIAGYMTYANKMPTATIKASGHTAEYKPAESFIMFQRWISGQPL : 425
CRU_004G02070 PFLATCAWIKSLNVPIDDRPWIINQIAGYMTYANKMPTATIKASGHTAEYKPAESFIMFQRWISGQPL : 398
CRU_004G02080 PFLATEAWIKSLNVPIDDRPWIINQIAGYMTYANKMPTATIKASGHTAEYKPAESFIMFQRWISGQPL : 425
CRU_004G02090 PFLATEAWIKSLNVPIDDRPWIINQIAGYMTYANKMPTATIKASGHTAEYKPAESFIMFQRWISGQPL : 425
CRU_004G02100 PFLATEAWIKSLNVPIDDRPWIINQIAGYMTYANKMPTATIKASGHTAEYKPAESFIMFQRWISGQPL : 425
CRU_004G02110 PFLATCAWIKSLNVPIDDRPWIINQIAGYMTYANKMPTATIKASGHTAEYKPAESFIMFQRWISGQPL : 424
CRU_004G02120 PFLATCAWIKSLNVPIDDRPWIINQIAGYMTYANKMPTATIKASGHTAEYKPAESFIMFQRWISGQPL : 423
CRU_004G02130 PFLATCAWIKSLNVPIDDRPWIINQIAGYMTYANKMPTATIKASGHTAEYKPAESFIMFQRWISGQPL : 423
TP4G02000 PFLATEAWIKSLNVPIDDRPWIINQIAGYMTYANKMPTATIKASGHTAEYKPAESFIMFQRWISGQPL : 419
TP4G02040 PFLATEAWIKSLNVPIDDRPWIINQIAGYMTYANKMPTATIKASGHTAEYKPAESFIMFQRWISGQPL : 426
TP4G02060 PFLATCAWIKSLNVPIDDRPWIINQIAGYMTYANKMPTATIKASGHTAEYKPAESFIMFQRWISGQPL : 407

```

## Supplementary Fig. 17b | G-block alignment using coding protein sequence of *SCPL* genes of in syntenic region of Brassicaceae species.

Sequence alignment was created by ClustalW in MEGA7.0 60 using G-blocks constructed by Gblocks 0.91b in Phylogeny.fr ([http://phylogeny.lirmm.fr/phylo.cgi/one\\_task.cgi?task\\_type=gblocks](http://phylogeny.lirmm.fr/phylo.cgi/one_task.cgi?task_type=gblocks)).

**Supplementary Table 1. Top 50 genes which are highly expressed in producing accessions.**

| Array Element | Locus Identifier                                                                       | Chr. | FC (producer /nonproducer) | description          | gene annotation                                                             |
|---------------|----------------------------------------------------------------------------------------|------|----------------------------|----------------------|-----------------------------------------------------------------------------|
| 259439_at     | At1g01480                                                                              | 1    | 7.33                       |                      | ACS2 (1-Amino-cyclopropane-1-carboxylate synthase 2)                        |
| 261020_at     | At1g26390                                                                              | 1    | 4.83                       |                      | FAD-binding domain-containing protein                                       |
| 263228_at     | At1g30700                                                                              | 1    | 5.89                       |                      | FAD-binding domain-containing protein                                       |
| 260706_at     | At1g32350                                                                              | 1    | 5.66                       |                      | AOX1D (ALTERNATIVE OXIDASE 1D)                                              |
| 261995_at     | At1g33850                                                                              | 1    | 4.83                       |                      | similar to N-terminal half of ribosomal protein S15                         |
| 260016_at     | At1g41795                                                                              | 1    | 6.83                       | transposable element | transposable element gene                                                   |
| 245865_at     | At1g58025                                                                              | 1    | 12.95                      |                      | unknown protein                                                             |
| 257500_s_at   | At1g73300, At5g36180                                                                   | 1    | 4.96                       | SCPL                 | SCPL2 (serine carboxypeptidase-like 2)                                      |
| 260225_at     | At1g74590                                                                              | 1    | 13.23                      |                      | ATGSTU10 (Arabidopsis thaliana Glutathione S-transferase (class tau) 10)    |
| 267479_at     | At2g02690                                                                              | 2    | 4.84                       |                      | unknown protein                                                             |
| 263768_x_at   | At2g06330                                                                              | 2    | 4.90                       | transposable element | transposable element gene                                                   |
| 266385_at     | At2g14610                                                                              | 2    | 5.64                       |                      | PR1 (PATHOGENESIS-RELATED GENE 1)                                           |
| 263071_at     | At2g17490                                                                              | 2    | 5.81                       | transposable element | transposable element gene                                                   |
| 265587_at     | At2g19980                                                                              | 2    | 7.70                       |                      | allergen V5/Tpx-1-related family protein                                    |
| 266827_at     | At2g22920                                                                              | 2    | 17.73                      | FPT1, SCPL12         | SCPL12; serine carboxypeptidase                                             |
| 267253_at     | At2g22960                                                                              | 2    | 6.68                       | FPT2, pseudo SCPL    | serine carboxypeptidase S10 family protein                                  |
| 263948_at     | At2g35980                                                                              | 2    | 6.27                       |                      | YLS9 (YELLOW-LEAF-SPECIFIC GENE 9)                                          |
| 265877_at     | At2g42380                                                                              | 2    | 6.72                       |                      | bZIP transcription factor family protein                                    |
| 260568_at     | At2g43570                                                                              | 2    | 6.36                       |                      | chitinase, putative                                                         |
| 266930_at     | At2g45930                                                                              | 2    | 4.81                       |                      | unknown protein                                                             |
| 257364_at     | At2g45940                                                                              | 2    | 6.13                       |                      | unknown protein                                                             |
| 266607_at     | At2g46300                                                                              | 2    | 4.93                       |                      | unknown protein                                                             |
| 259206_at     | At3g09040                                                                              | 3    | 4.99                       |                      | pentatricopeptide (PPR) repeat-containing protein                           |
| 256933_at     | At3g22600                                                                              | 3    | 4.87                       |                      | protease inhibitor/seed storage/lipid transfer protein (LTP) family protein |
| 256859_at     | At3g22940                                                                              | 3    | 4.96                       |                      | F-box family protein-related                                                |
| 258028_at     | At3g27473                                                                              | 3    | 5.56                       |                      | DC1 domain-containing protein                                               |
| 257774_at     | At3g29250                                                                              | 3    | 5.54                       |                      | oxidoreductase                                                              |
| 245222_at     | At3g29787                                                                              | 3    | 36.63                      | transposable element | transposable element gene                                                   |
| 256940_at     | At3g30720                                                                              | 3    | 8.38                       |                      | unknown protein                                                             |
| 256610_at     | At3g30845                                                                              | 3    | 4.90                       |                      | unknown protein                                                             |
| 256694_at     | At3g32080                                                                              | 3    | 6.95                       | transposable element | transposable element gene                                                   |
| 256643_at     | At3g32290                                                                              | 3    | 8.08                       | transposable element | unknown protein similar to putative retroelement pol polyprotein            |
| 252775_s_at   | At3g42930, At5g30545                                                                   | 3    | 8.33                       | transposable element | transposable element gene                                                   |
| 251625_at     | At3g57260                                                                              | 3    | 4.79                       |                      | BGL2 (PATHOGENESIS-RELATED PROTEIN 2)                                       |
| 251344_at     | At3g60920                                                                              | 3    | 8.80                       |                      | beige/BEACH domain-containing protein                                       |
| 255437_at     | At4g03060                                                                              | 4    | 10.73                      |                      | AOP2 (ALKENYL HYDROXYALKYL PRODUCING 2), glucosinolate                      |
| 255375_at     | At4g03780                                                                              | 4    | 4.88                       | transposable element | transposable element gene                                                   |
| 255340_at     | At4g04490                                                                              | 4    | 6.29                       |                      | protein kinase family protein                                               |
| 255146_at     | At4g08450                                                                              | 4    | 4.95                       |                      | disease resistance protein (TIR-NBS-LRR class), putative                    |
| 245393_at     | At4g16260                                                                              | 4    | 10.01                      |                      | glycosyl hydrolase family 17 protein                                        |
| 253707_at     | At4g29200                                                                              | 4    | 18.86                      |                      | beta-galactosidase                                                          |
| 253505_at     | At4g31970                                                                              | 4    | 12.08                      |                      | CYP82C2 (cytochrome P450)                                                   |
| 246252_s_at   | At4g37070, At4g37060                                                                   | 4    | 5.62                       |                      | PLA IVA/PLP1; nutrient reservoir                                            |
| 253044_at     | At4g37290                                                                              | 4    | 6.08                       |                      | unknown protein                                                             |
| 250983_at     | At5g02780                                                                              | 5    | 8.60                       |                      | In2-1 protein, putative                                                     |
| 256136_s_at   | At5g13205, At1g58140, At1g48710, At1g48720, At3g59720, At1g11265, At1g21945, At3g61330 | 5    | 5.25                       | transposable element | transposable element gene                                                   |
| 246927_s_at   | At5g25260, At5g25250                                                                   | 5    | 8.12                       |                      | unknown protein                                                             |

|           |           |   |      |                                                                         |
|-----------|-----------|---|------|-------------------------------------------------------------------------|
| 246826_at | At5g26310 | 5 | 4.84 | UGT72E3; UDP-glycosyltransferase/ coniferyl-alcohol glucosyltransferase |
| 249599_at | At5g37990 | 5 | 4.91 | S-adenosylmethionine-dependent methyltransferase                        |
| 249465_at | At5g39720 | 5 | 6.59 | AIG2L (AVIRULENCE INDUCED GENE 2 LIKE PROTEIN)                          |



**Supplementary Table 2. The site of origin of Arabidopsis accessions used in this study.**

| accession name | saiginol production | country<br>(Sulpice et al., 2007) | city                         | country<br>(1001 genomes project) | altitude   |          | latitude | longitude | UV-B irradiation<br>(J/m <sup>2</sup> ) |
|----------------|---------------------|-----------------------------------|------------------------------|-----------------------------------|------------|----------|----------|-----------|-----------------------------------------|
|                |                     |                                   |                              |                                   | literature | SRTM     |          |           |                                         |
| An-2           | non-producer        | Belgium                           | Antwerpen                    | Netherlands                       | 1-100      | 9.00     | 51.50    | 4.50      | 18727                                   |
| Ang-0          | producer            | Belgium                           | Angleur (Prov. de Liege)     | Belgium                           | 1-100      | 270.44   | 50.37    | 5.35      | 17935                                   |
| Bd-0           | non-producer        | Germany                           | Berlin/Dahlem                | Germany                           | 1-100      | 47.25    | 52.30    | 13.24     | 17762                                   |
| Be-0           | producer            | Germany                           | Bensheim/Bergstr.            | Germany                           | 100-200    | 99.39    | 49.41    | 8.37      | 18301                                   |
| Bla-11         | producer            | Spain                             | Blanes/Gerona                | Spain                             | 1-100      | 95.48    | 41.70    | 2.79      | 29140                                   |
| Blh-1          | producer            |                                   | Bulhary                      | Austria                           | 100-200    | 248.38   | 48.49    | 16.45     | 19019                                   |
| Bsch-2         | producer            | Germany                           | Buchschlag/FFM               | Germany                           | 1-100      | 95.85    | 50.01    | 8.40      | 17615                                   |
| Bu-2           | non-producer        | Germany                           | Burghaun/Rhon                | Germany                           | 260        | 465.38   | 50.42    | 9.43      | 17054                                   |
| Bur-0          | non-producer        | Ireland                           | Burren (Eire)                | ireland                           | 1-100      | 186.18   | 53.07    | -9.04     | 16561                                   |
| C24            | producer            | Portugal                          | Lousa                        | Portugal                          | 100-200    | 146.86   | 40.12    | -8.25     | 30139                                   |
| Can-0          | producer            | Canary Island                     | Las Palmas de Gran Canaria   | Morocco                           | 1200-1300  | 1260.00* | 28.00    | -15.30    | 37817                                   |
| Cha-0          | producer            | Switzerland                       | Champex                      | Switzerland                       | 1500-1600  | 1973.75  | 46.02    | 7.07      | 27714                                   |
| Co-3           | producer            | Portugal                          | Coimbra                      | Portugal                          | 100-200    | 146.86   | 40.12    | -8.25     | 30139                                   |
| Col-0          | non-producer        | USA                               | Columbia                     | USA                               | 1-100      | 249.43   | 38.50    | -92.50    | not available                           |
| Cvi-0          | producer            | Cape Verde Islands                | Cape Verdi Islands           | Senegal                           | 1100-1200  | 1150*    | 15.00    | -24.40    | 41001                                   |
| Da-0           | producer            | Germany                           | Darmstadt                    | Germany                           | 100-200    | 89.07    | 49.52    | 8.38      | 18074                                   |
| Dijon-M        | non-producer        | Unknown                           |                              | Russia                            | 100-200    | 186.31   | 55.45    | 37.35     | 17340                                   |
| Edi-0          | non-producer        | United Kingdom                    | Edinburgh                    | UK                                | 1-100      | 64.82    | 55.95    | -3.18     | 14661                                   |
| EI-0           | non-producer        | Germany                           | Ellershausen                 | Germany                           | 100-200    | 492.74   | 51.31    | 9.40      | 17106                                   |
| Est-1          | producer            | Estland                           | Estland                      | Estonia                           | 100-200    | 29.11    | 58.35    | 25.00     | 17338                                   |
| Gol-1          | producer            |                                   | Scotland Golspie             | UK                                | 1-100      | 6.73     | 57.97    | -3.97     | 14871                                   |
| Gr-1           | producer            |                                   | Graz, Austria                | Austria                           | 1-100      | 332.00   | 47.00    | 15.50     | 21147                                   |
| HI-3           | non-producer        | Germany                           | Holtensen                    | Germany                           | 200-300    | 260.26   | 51.50    | 9.50      | 17225                                   |
| HOG            | producer            |                                   | Tadjikistan, Khodga-Obi-Garm | Tajikistan                        | 1700-1800  | 1750.00  | 38.55    | 68.47     | not available                           |
| Hs-0           | non-producer        | Germany                           | Hannover/Stroehe             | Germany                           | 1-100      | 39.13    | 52.50    | 9.50      | 16237                                   |
| Je-54          | producer            | Czechoslovakia                    |                              | Czech republic                    | 250        | 278.97   | 49.30    | 17.00     | 18277                                   |
| JEA            | producer            | France                            | St Jean Cap Ferrat (06230)   | France                            | 1-100      | 10.83    | 43.69    | 7.33      | 28119                                   |
| Kas-1          | producer            |                                   | Kashimir                     | Jammu and Kashmir                 | 1580       | 2324.00  | 34.00    | 74.00     | not available                           |
| KI-0           | non-producer        | Germany                           | Koeln                        | Germany                           | 1-100      | 414.06   | 50.55    | 6.57      | 17859                                   |
| Kn-0           | producer            | Lithuania                         | Kaunas                       | Lithuania                         | 1-100      | 87.00    | 54.54    | 23.54     | 20136                                   |
| Ler-0          | non-producer        |                                   | Landsberg                    | Poland                            | 1-100      | 66.48    | 52.50    | 15.50     | 17431                                   |
| Lip-0          | producer            | Poland                            | Lipowiec/Chrzanow            | Poland                            | 400-500    | 240.08   | 50.09    | 19.24     | 16982                                   |
| Lov-5          | non-producer        | Sweden                            | Lovvik (harnosand Area)      | Sweden                            | 1-100      | 2.60     | 62.63    | 17.94     | 16450                                   |
| Lovel-1        | non-producer        |                                   |                              | Denmark                           | 1-100      | 2.96     | 56.57    | 9.48      | 19796                                   |
| Lu             | producer            | Sweden                            | Lund                         | Sweden                            | 1-100      | 13.10    | 55.40    | 13.13     | 18274                                   |
| Mh-1           | producer            | Poland                            | Muehen (OstPr)               | Poland                            | 100-200    | 193.19   | 53.31    | 20.12     | 17758                                   |
| Mt-0           | producer            | Libya                             | Martuba/Cyrenaika            | Libya                             | 100-200    | 283.05   | 32.34    | 22.46     | 35451                                   |
| Nd             | non-producer        | Germany                           | Golm-Potsdam                 | Germany                           | 40         | 49.05    | 52.24    | 12.58     | 17668                                   |
| NFA-8          | non-producer        | United Kingdom                    | Ascot (England)              | UK                                | 1-100      | 79.90    | 51.41    | -0.70     | 16229                                   |
| No-0           | producer            | Germany                           |                              | Germany                           | 400        | 417.73   | 51.00    | 9.00      | 16960                                   |
| Nok-2          | non-producer        | Netherlands                       | Noordwijk                    | Netherlands                       | 1-100      | 7.90     | 52.23    | 4.26      | 20483                                   |
| Nok-1          | non-producer        | Netherlands                       | Noordwijk                    | Netherlands                       | 1-100      | 7.90     | 52.37    | 4.47      | 20874                                   |

|            |              |                |                        |                |           |         |       |       |               |
|------------|--------------|----------------|------------------------|----------------|-----------|---------|-------|-------|---------------|
| Nw-3       | non-producer | Germany        | Neuweilnau             | Germany        | 100-200   | 457.83  | 50.19 | 8.25  | 17202         |
| Old-1      | non-producer | Germany        | Oldenburg              | Germany        | 1-100     | 9.27    | 53.10 | 8.10  | 17950         |
| Oy-0       | non-producer | Norway         | Oystese                | Norway         | 1-100     | 31.04   | 60.38 | 6.20  | 12640         |
| Petergof   | producer     | Russia         | Petergof               | Russia         | 100-200   | 153.31  | 59.53 | 29.53 | 17487         |
| Po-0       | non-producer | Germany        | Poppelsdorf            | Germany        | 1-100     | 72.12   | 50.72 | 7.09  | 16940         |
| Pyl-1      | non-producer | France         | Le Pyla (33115)        | France         | 1-100     | 45.35   | 44.39 | -1.10 | 25981         |
| Ra-0       | non-producer | France         | Randan, Puy-de-Dome    | France         | 400-500   | 305.82  | 46.00 | 3.50  | 23665         |
| RLD-1      | producer     | Netherlands    |                        | Netherlands    | 1-100     | 17.76   | 52.15 | 5.30  | 18755         |
| Rsch-0     | producer     | Russia         | Rschew/Starize         | Russia         | 100-200   | 231.67  | 57.00 | 33.60 | 16520         |
| Rubezhno-1 | non-producer | Ukraine        | Rubezhnoe              | Ukraine        |           | 189.21  | 48.13 | 37.19 | 22264         |
| Sap-0      | non-producer | Czechoslovakia | Slapy                  | Czech republic | 400-500   | 494.61  | 49.49 | 14.24 | 19126         |
| Sav-0      | producer     | Czechoslovakia | Slavice                | Germany        | 500-600   | 701.00  | 49.49 | 12.56 | 18612         |
| Shakdara   | producer     | Tadjikistan    | Shakdara River (Pamir) | Afghanistan    | 3300-3400 | 4178.09 | 37.29 | 71.30 | not available |
| St-0       | non-producer | Sweden         | Stockholm              | Sweden         | 1-100     | 76.69   | 59.19 | 18.03 | 17903         |
| Stw-0      | non-producer | Russia         | Stobowa/Orel           | Russia         | 100-200   | 217.00  | 52.57 | 36.04 | 19751         |
| Ta-0       | producer     | Czechoslovakia | Tabor                  | Czech republic | 400-500   | 398.20  | 49.25 | 14.40 | 18996         |
| Te-0       | non-producer | Finland        | Tenala                 | Finland        | 1-100     | 30.91   | 60.04 | 23.18 | 17393         |
| Ty-0       | non-producer |                | Taynuilt               | UK             |           | 19.26   | 56.43 | -5.24 | 13523         |
| Wei-1      | non-producer | Switzerland    | Weiningen              | Switzerland    | 400-500   | 529.38  | 47.25 | 8.25  | 21284         |
| Will       | producer     | Lithuania      | Vilnius                | Lithuania      | 100-200   | 147.89  | 54.41 | 25.19 | 19860         |
| Ws-0       | non-producer | Belarus        | Wassilewskija          | Belarus        | 100-200   | 129.00  | 52.13 | 30.38 | 20249         |
| Zue-1      | non-producer |                | ZURICH                 | Germany        |           | 707.60  | 48.00 | 8.50  | 20649         |

Altitude are shown by data from literatures (Sulpice et al., 2007) and 1001 genomes project (<http://1001genomes.org/>), and calculated by Shuttle Radar Topography Mission (SRTM, <http://www2.jpl.nasa.gov/srtm/>). \* indicates altitude from 1001 genomes project (<http://1001genomes.org/>). UV-B irradiation (J/m2) averaged of daily UV-B irradiance during 1985 and 2005 estimated from satellite data (Soda (<http://www.soda-is.com/eng/index.html>)).

**Supplementary Table 3. Primers used for sequencing and cloning of FPT1 and FPT2.**Primers were designed using NCBI blast primer (<http://www.ncbi.nlm.nih.gov/tools/primer-blast/>)

| primer name                                                       | sequence                                                 | length |
|-------------------------------------------------------------------|----------------------------------------------------------|--------|
| <u>DNA-cloning of At2g22920 from C24 and Col0</u>                 |                                                          |        |
| cDNA_At2g22920_FW3                                                | ATGAAATCAACACCAAAT                                       | 19     |
| cDNA_At2g22920_REV1                                               | ATTTAGGTAAGGTCATTCAAGTA                                  | 23     |
| <u>cDNA-cloning of At2g22960 from C24 and Col0</u>                |                                                          |        |
| cDNA_At2g22960_FW1                                                | ATGAGAACTTTTTACCCAAGTT                                   | 23     |
| cDNA_At2g22960_REV1                                               | TCATCATCTCTTATTATTACAGA                                  | 23     |
| <u>genomic sequence cloning from At2g22920 from C24 and Col-0</u> |                                                          |        |
| BP-20-FW                                                          | GGGGACAAGTTTGTACAAAAAAGCAGGCTCCACCATGAAATCAACACCAAATTGCT | 57     |
| BP-20-REV                                                         | GGGGACCACTTTGTACAAGAAAGCTGGGTCTGCGCCACTTCCCTGTAATG       | 50     |
| <u>genomicDNA-cloning from At2g22960 from Col0</u>                |                                                          |        |
| BP-P64-60-FW                                                      | GGGGACAAGTTTGTACAAAAAAGCAGGCTCCACCATGAGAACTTTTTACCCAAGTT | 57     |
| BP-P66-60-REV                                                     | GGGGACCACTTTGTACAAGAAAGCTGGGTCTCATCATCTCTTATTATTACAGA    | 53     |
| <u>genomic sequence cloning from At2g22920 from C24 and Col0</u>  |                                                          |        |
| TT1f_v2-FW                                                        | TGGACTAGTACGAGAATTGCAAAG                                 | 24     |
| TT1f_v2-REV                                                       | ACCGGGAAGAACTTGACGA                                      | 20     |
| TT2f_v4-FW                                                        | CGTGGAGCGACCAGTGAT                                       | 18     |
| TT2f_v4-REV                                                       | CTTCACGTACCCTCTCGTCA                                     | 20     |
| TT3f_v2-FW                                                        | CTTATGCAGGGCTACCACAGT                                    | 21     |
| TT3f_v2-REV                                                       | ACCACTGTTTACCAAAAACCGC                                   | 22     |
| TT4f_v1-FW                                                        | ATATCATATGAATAACAGCATC                                   | 22     |
| TT4f_v1-REV                                                       | GCATAGGGCATCATCATCTC                                     | 20     |
| <u>* Primer sets amplifying only C24 insertion</u>                |                                                          |        |
| TT222-FW                                                          | TGAGCTCATGATTGACTGAGTTAATG                               | 27     |

## Supplementary Note 1. Spectrometric data of saiginol A.

### kaempferol-3-O-[2-O-( $\alpha$ -L-rhamnopyranosyl)-6-O-(sinapoyl)- $\beta$ -D-glucopyranoside]-7-O- $\alpha$ -L-rhamnopyranoside

Yellow amorphous solid.  $[\alpha]_D^{20} - 54.1^\circ$  (*c* 0.09, MeOH). UV (MeOH):  $\lambda_{\max}$  (log $\epsilon$ ): 201.5 (3.47), 223.0 (3.61), 266.5 (3.37), 331.5 (3.47). HRESI-MS: *m/z* 969.2637 ( $[M+Na]^+$ , calcd. for  $C_{44}H_{50}O_{23}Na$ , 969.2635).  $^1H$  NMR ( $CD_3OD$ )  $\delta$ : 6.25 (1H, br.s, H-6), 6.41 (1H, br.s, H-8), 7.90 (2H, d,  $J = 8.8$  Hz, H-2' and H-6'), 6.85 (2H, d,  $J = 8.8$  Hz, H-3' and H-5') (kaempferol; H-6, 8, H-2' to 6'), 5.75 (1H, d,  $J = 7.2$  Hz, H-1), 3.63 (1H, m, H-2), 3.58 (1H, m, H-3), 3.32 (1H, m, H-4), 3.51 (1H, m, H-5), 4.26 (1H, m, H-6a), 4.40 (1H, m, H-6b) (glucose; H-1 to H-6a,b), 5.23 (1H, br.s, H-1), 3.99 (1H, m, H-2), 3.75 (1H, m, H-3), 3.32 (1H, m, H-4), 3.97 (1H, m, H-5), 0.90 (1H, m, H-6) (rhamnose 1; H-1 to H-6), 6.66 (2H, s, H-2), 6.06 (1H, d,  $J = 16.0$ , H-7 $\alpha$ ), 7.28 (1H, d,  $J = 16.0$ , H-8 $\beta$ ), 3.87 (6H, s, -OCH<sub>3</sub>) (sinapic acid; H-2, H-7 $\alpha$ , H-8 $\beta$  and -OCH<sub>3</sub>), 5.33 (1H, br.s, H-1), 3.47 (1H, m, H-2), 4.04 (1H, m, H-3), 3.76 (1H, m, H-4), 3.47 (1H, m, H-5), 1.18 (1H, m, H-6) (rhamnose 2; H-1 to H-6).  $^{13}C$  NMR ( $CD_3OD$ )  $\delta$ : 161.7, 134.5, 179.7, 159.7, 99.9, 163.2, 96.4, 157.9, 107.5, 123.2, 132.5, 116.4, 163.0, 116.4, 132.5 (kaempferol; C-2 to C-10 and C-1' to C-6'); 100.2, 80.2, 79.2, 74.3, 76.1, 64.6 (glucose; C-1 to C-6); 102.8, 70.4, 72.5, 72.6, 72.6, 17.2 (rhamnose 1; C-1 to C-6), 12.75, 107.0, 148.5, 139.5, 149.5, 107.0, 115.6, 147.0, 168.7 (sinapic acid; C1- to C-9), 99.9, 71.4, 71.8, 72.3, 73.9, 19.3 (rhamnose 2; C-1 to C-6). HMBC correlations from the anomeric proton (Rha1 H-1,  $\delta$  5.23) to C-2 of glucose, the protons (glucose H-6a,b,  $\delta$  4.26 and 4.40) to C-9 of sinapic acid and the anomeric proton (Rha2 H-1,  $\delta$  5.33) to C-7 of kaempferol were observed.
